# Supplementary material
Source: PubMed Central journal article supplement (PMC5373375)
Supplement: pnas.1702510114.sapp.pdf [file pnas.1702510114.sapp.pdf]

# Metallacycle-cored supramolecular assemblies with tunable fluorescence including white-light emission

*A Submission to the Proceedings of the National Academy of Science USA*

PHYSICAL SCIENCES: Chemistry

Mingming Zhang,<sup>a</sup> Shouchun Yin,<sup>a,b,1</sup> Jing Zhang,<sup>b</sup> Zhixuan Zhou,<sup>a</sup> Manik Lal Saha,<sup>a</sup> Chenjie Lu<sup>b</sup> and Peter J. Stang<sup>a,1</sup>

<sup>a</sup>Department of Chemistry, University of Utah, 315 South 1400 East, Room 2020, Salt Lake City, Utah 84112;

<sup>b</sup>College of Material, Chemistry and Chemical Engineering, Hangzhou Normal University, Hangzhou 310036, China

<sup>1</sup>To whom correspondence should be addressed. Email address: [yinsc@hznu.edu.cn](mailto:yinsc@hznu.edu.cn); [stang@chem.utah.edu](mailto:stang@chem.utah.edu)

## Table of Contents

|                                                                                                           |     |
|-----------------------------------------------------------------------------------------------------------|-----|
| <b>Section A. Materials/General Methods/Instrumentation</b>                                               | S3  |
| 1. <i>General materials and instrumentation</i>                                                           | S3  |
| <b>Section B. Synthetic Procedures and Characterization Data</b>                                          | S4  |
| 1. <i>Synthesis of compound 5</i>                                                                         | S5  |
| 2. <i>Synthesis of hexa(ethylene glycol) ditosylate</i>                                                   | S5  |
| 3. <i>Synthesis of compound 6</i>                                                                         | S6  |
| 4. <i>Synthesis of compound 7</i>                                                                         | S8  |
| 5. <i>Synthesis of compound 8</i>                                                                         | S10 |
| 6. <i>Synthesis of compound 9</i>                                                                         | S12 |
| 7. <i>Synthesis of compound 10</i>                                                                        | S13 |
| 8. <i>Synthesis of compound 11</i>                                                                        | S14 |
| 9. <i>Synthesis of compound 12</i>                                                                        | S14 |
| 10. <i>Synthesis of rhomboidal metallacycle 1</i>                                                         | S16 |
| 11. <i>Synthesis of rhomboidal metallacycle 2</i>                                                         | S18 |
| 12. <i>Synthesis of rhomboidal metallacycle 3</i>                                                         | S20 |
| 13. <i>Synthesis of compound 14</i>                                                                       | S22 |
| 14. <i>Synthesis of bis-ammonium salt 4</i>                                                               | S24 |
| <b>Section C. Host-guest complexation study between crown ether 8 and ammonium salt 9</b>                 | S26 |
| 1. <i><sup>1</sup>H NMR spectra of an equimolar acetone solution of 8 and 9</i>                           | S26 |
| 2. <i>Determination of association constant (<math>K_a</math>) by <sup>1</sup>H NMR titration method</i>  | S27 |
| <b>Section D. The characterization of the supramolecular oligomers</b>                                    | S29 |
| 1. <i>The size of the supramolecular oligomers by two-dimensional diffusion-ordered NMR (DOSY) method</i> | S29 |

|                                                                           |     |
|---------------------------------------------------------------------------|-----|
| <b>Section E. The effect of counter-ions towards the assembly process</b> | S29 |
| 1. <i>Synthesis of bis-ammonium salt 4 with OTf as counter ions</i>       | S29 |
| 2. <i>The <sup>1</sup>H NMR spectra of the mixture of 1 and 4</i>         | S30 |
| <b>Section F. The fluorescence properties of 1 and 4</b>                  | S30 |
| 1. <i>The aggregation-induced emission (AIE) property of 1</i>            | S30 |
| 2. <i>The aggregation-caused quenching (ACQ) property of 4</i>            | S31 |
| <b>Section G. References</b>                                              | S31 |

## Section A. Materials/General Methods/Instrumentation

### 1. General materials and instrumentation

All reagents and deuterated solvents were commercially available and used without further purification. Compounds **5**,<sup>S1</sup> hexa(ethylene glycol) ditosylate,<sup>S2</sup> Pt(PEt<sub>3</sub>)<sub>4</sub>,<sup>S3</sup> **9**,<sup>S4</sup> **10**,<sup>S5</sup> **11**<sup>S6</sup> and 4,4'-((5-bromo-1,3-phenylene)bis(ethyne-2,1-diyl))dipyridine<sup>S7</sup> were prepared according to the literature procedures. NMR spectra were recorded on a Varian Unity 300 MHz or 400 MHz spectrometer. <sup>1</sup>H and <sup>13</sup>C NMR chemical shifts are reported relative to residual solvent signals, and <sup>31</sup>P{<sup>1</sup>H} NMR chemical shifts are referenced to an external unlocked sample of 85% H<sub>3</sub>PO<sub>4</sub> (δ 0.0). Mass spectra were recorded on a Micromass Quattro II triple-quadrupole mass spectrometer using electrospray ionization with a MassLynx operating system. The melting points were collected on a SHPSIC WRS-2 automatic melting point apparatus. The UV-Vis experiments were conducted on a Hitachi U-4100 absorption spectrophotometer. The fluorescent experiments were conducted on a Hitachi F-7000 fluorescence spectrophotometer. Quantum yields were determined using quinine sulfate at 365 nm ( $\Phi_F = 56\%$ ).

## Section B. Synthetic Procedures and Characterization Data

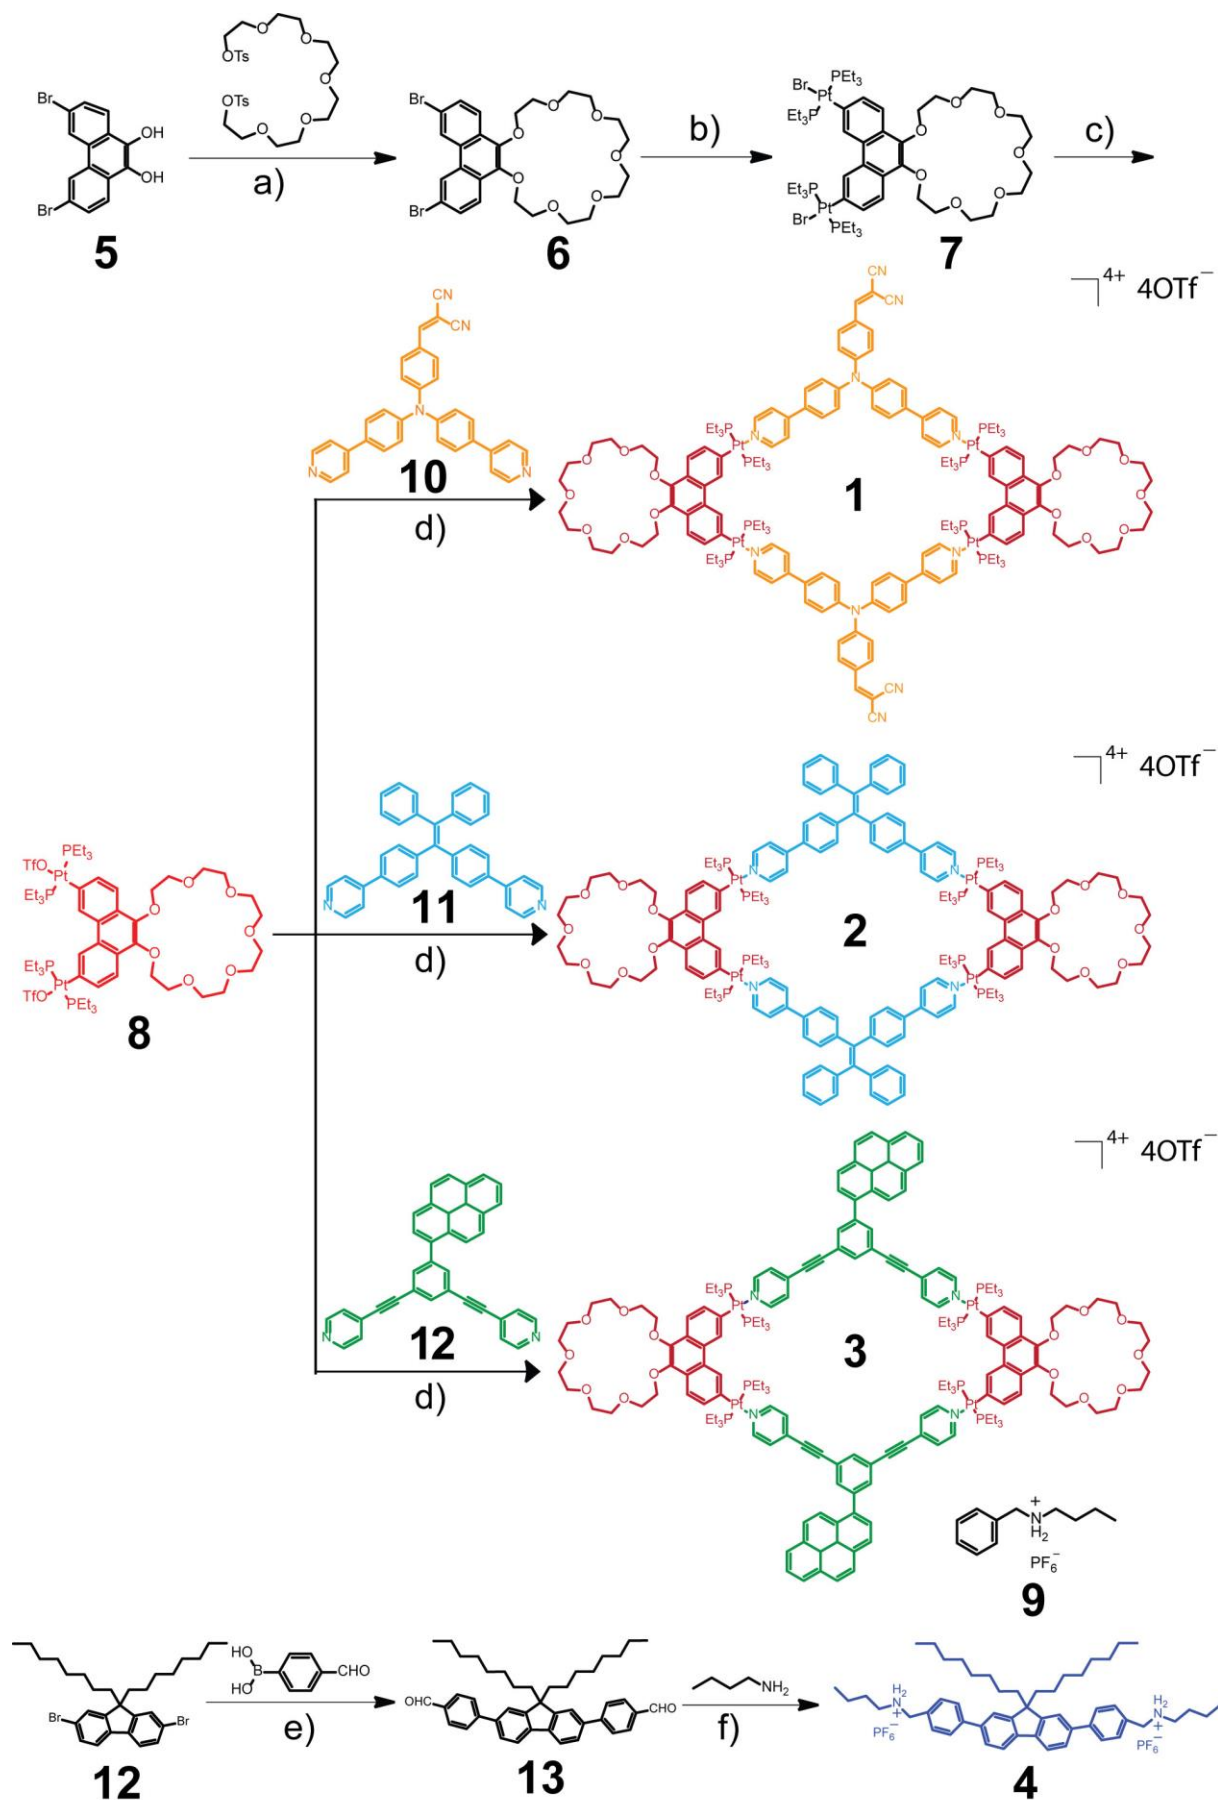

**Scheme S1.** Synthetic routes of rhomboidal metallacycles **1**, **2**, **3** and bis-ammonium salt **4** and chemical structures of compounds used in this study. Conditions: a)  $K_2CO_3$ ,  $CH_3CN$ , reflux, 72 h; 64%; b)  $Pt(PEt_3)_4$ , toluene, 95 °C, 72 h; 68%; c)  $AgOTf$ ,  $CH_2Cl_2$ , room temperature, 12 h; 95%; d)  $CH_2Cl_2$ , room temperature, 12 h; 90-96%; e)  $K_2CO_3$ ,  $Pd(PPh_3)_4$ , dioxane/water (2:1), 90 °C, 48 h; 63%; f) (i) *n*-butylamine,  $CH_3OH$ , reflux, 12h; (ii)  $NaBH_4$ , room temperature, 24 h; (iii)  $HCl$  (aq) and (iv)  $NH_4PF_6$ (aq); 27% in four steps.

### 1. Synthesis of compound **5**

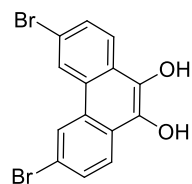

Compound **5** was synthesized according to literature procedure.<sup>S1</sup> The  $^1H$  NMR of **5** matches well with the reported data.  $^1H$  NMR (400 MHz, DMSO, 295K): 9.26 (br, 2H, ArOH), 9.00 (s, 2H), 8.08 (d,  $J = 8.6$  Hz, 2H), 7.76 (d,  $J = 8.6$  Hz, 2H).

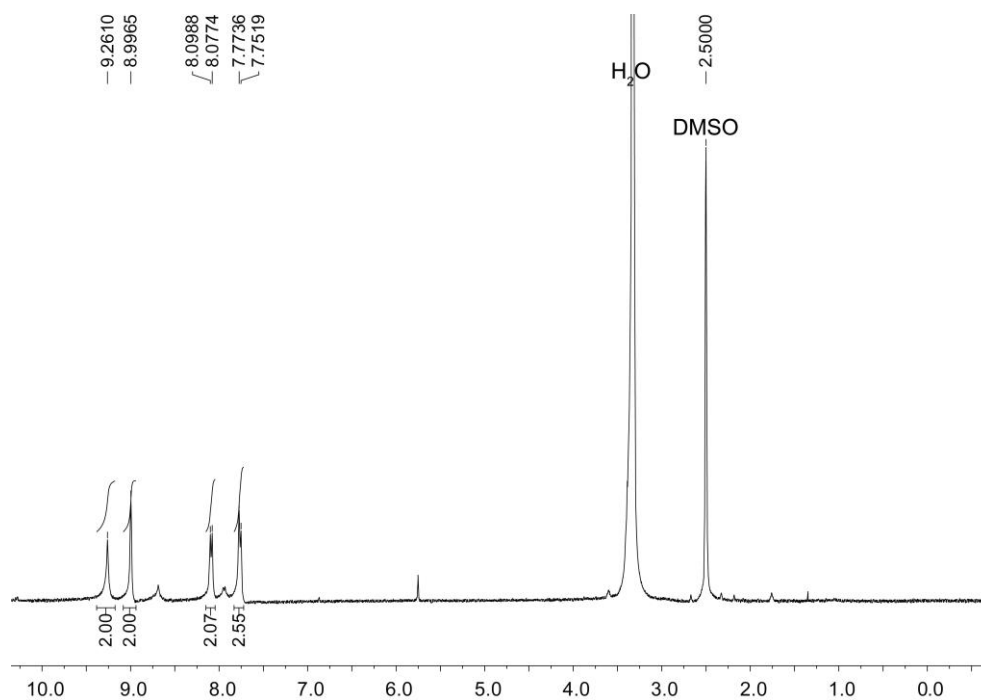

**Figure S1.**  $^1H$  NMR spectrum (400 MHz, DMSO, 295 K) recorded for **5**.

### 2. Synthesis of hexa(ethylene glycol) ditosylate

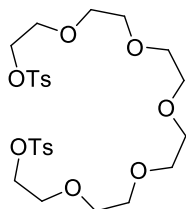

Hexa(ethylene glycol) ditosylate was synthesized according to literature procedure.<sup>S2</sup> The  $^1H$  NMR of hexa(ethylene glycol) ditosylate matches well with the reported data.  $^1H$  NMR (400 MHz,  $CDCl_3$ , 295K): 7.79 (d,  $J = 8.2$  Hz, 4H), 7.34 (d,  $J = 8.2$  Hz, 4H), 4.15 (t,  $J = 4.8$  Hz, 4H), 3.68 (t,  $J = 4.8$  Hz, 4H), 3.60–3.63 (m, 8H), 3.57–3.59 (m, 8H), 2.44 (s, 6H).

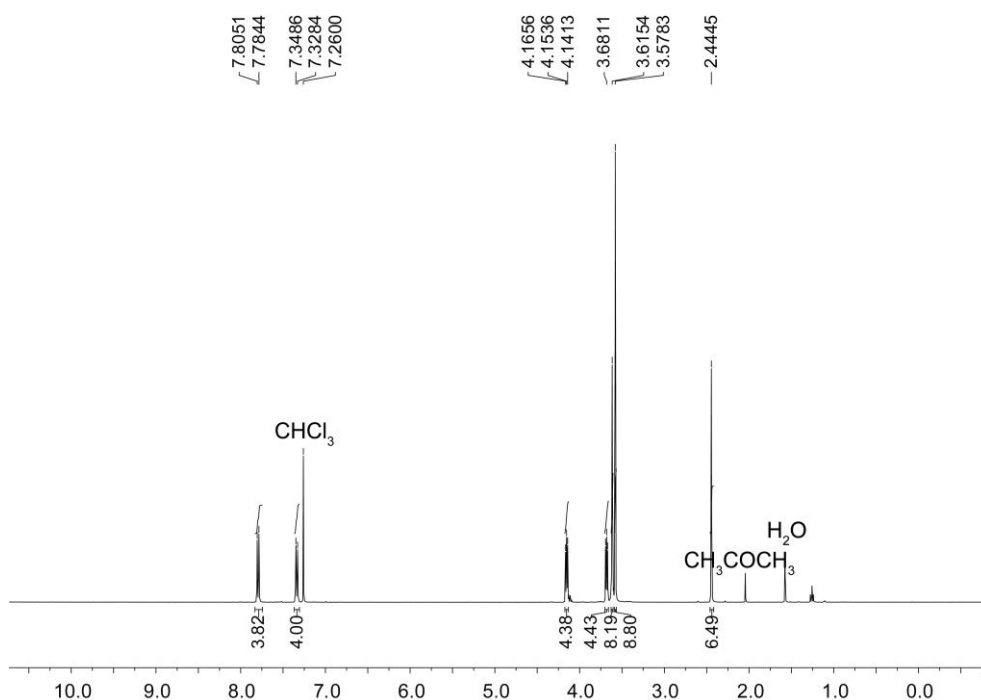

**Figure S2.**  $^1\text{H}$  NMR spectrum (400 MHz,  $\text{CDCl}_3$ , 295 K) recorded for hexa(ethylene glycol) ditosylate.

### 3. Synthesis of compound **6**

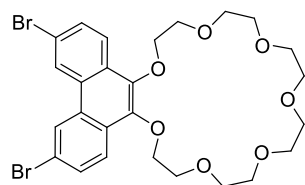

Compound **5** (500 mg, 1.36 mmol), hexa(ethylene glycol) ditosylate (802 mg, 1.36 mmol),  $\text{K}_2\text{CO}_3$  (563 mg, 4.08 mmol) and  $\text{KPF}_6$  (375 mg, 2.04 mmol) were added into  $\text{CH}_3\text{CN}$  (30 mL) and the whole reaction mixture was heated at reflux for 72 h under nitrogen. Then the system was cooled down and filtered. The filtrate was collected and the solvent was removed with a rotaevaporator.  $\text{H}_2\text{O}$  (100 mL) was added and the mixture was extracted by ethyl acetate (50 mL  $\times$  3), dried over anhydrous  $\text{Na}_2\text{SO}_4$  and then concentrated. The residue was purified by silica gel flash column chromatography ( $\text{CH}_2\text{Cl}_2$ /ethyl acetate,  $v/v$  1:4) to provide compound **6** (534 mg, 64%) as a white solid. M. P. 160.5–162.8  $^\circ\text{C}$ .  $^1\text{H}$  NMR (400 MHz,  $\text{CDCl}_3$ , 295K): 8.64 (d,  $J = 1.7$  Hz, 2H), 8.16 (d,  $J = 8.8$  Hz, 2H), 7.70 (dd,  $J_1 = 8.8$  Hz,  $J_2 = 1.7$  Hz, 2H), 4.42 (t,  $J = 4.3$  Hz, 4H), 4.00 (t,  $J = 4.3$  Hz, 4H), 3.77–3.85 (m, 4H), 3.71–3.77 (m, 4H), 3.66–3.71 (m, 8H).  $^{13}\text{C}$  NMR (100 MHz,  $\text{CDCl}_3$ , 295K): 142.6, 130.2, 128.5, 128.1, 125.0, 124.1, 120.2, 72.4, 71.1, 70.5, 70.4, 70.2. ESI-HR-MS:  $m/z$  637.0221 [**6** +  $\text{Na}$ ] $^+$ , calcd. for  $[\text{C}_{26}\text{H}_{30}\text{Br}_2\text{O}_7\text{Na}]^+$ , 637.0236.

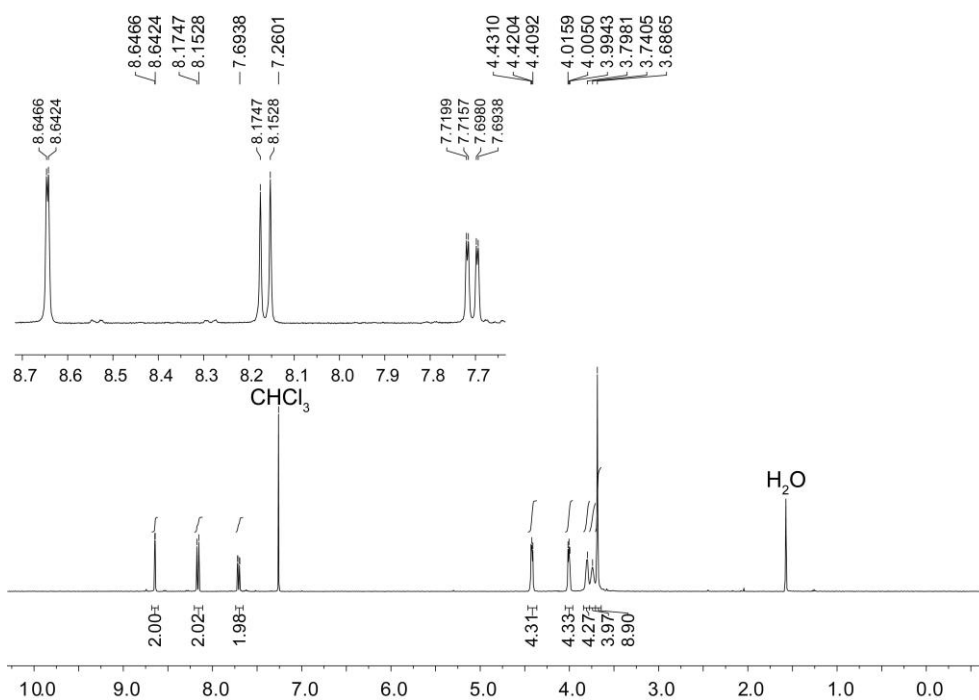

**Figure S3.** <sup>1</sup>H NMR spectrum (400 MHz, CDCl<sub>3</sub>, 295 K) recorded for **6**.

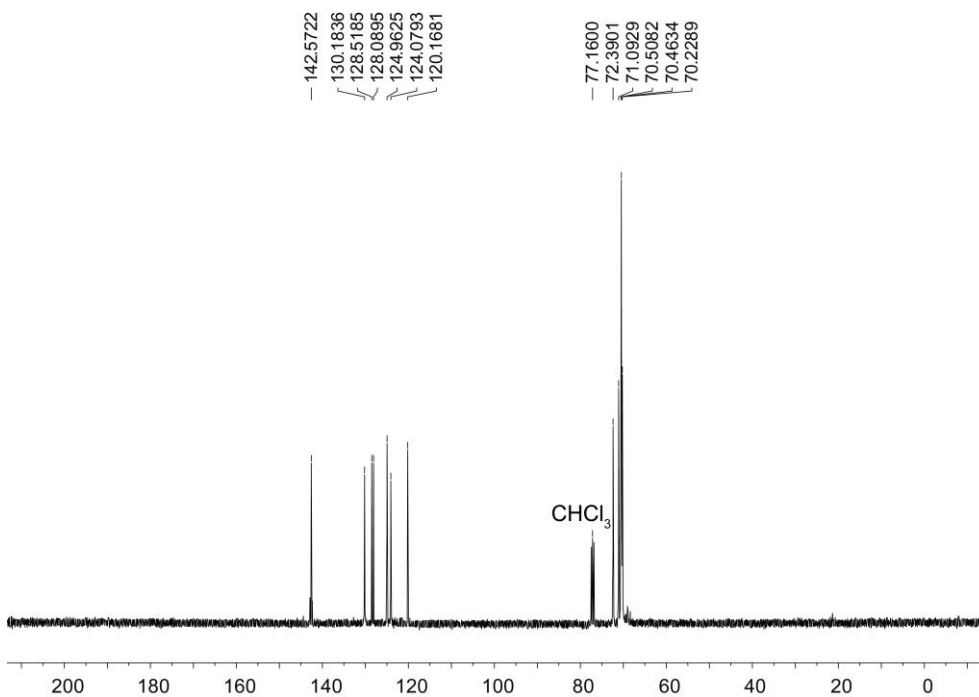

**Figure S4.** <sup>13</sup>C NMR spectrum (100 MHz, CDCl<sub>3</sub>, 295 K) recorded for **6**.

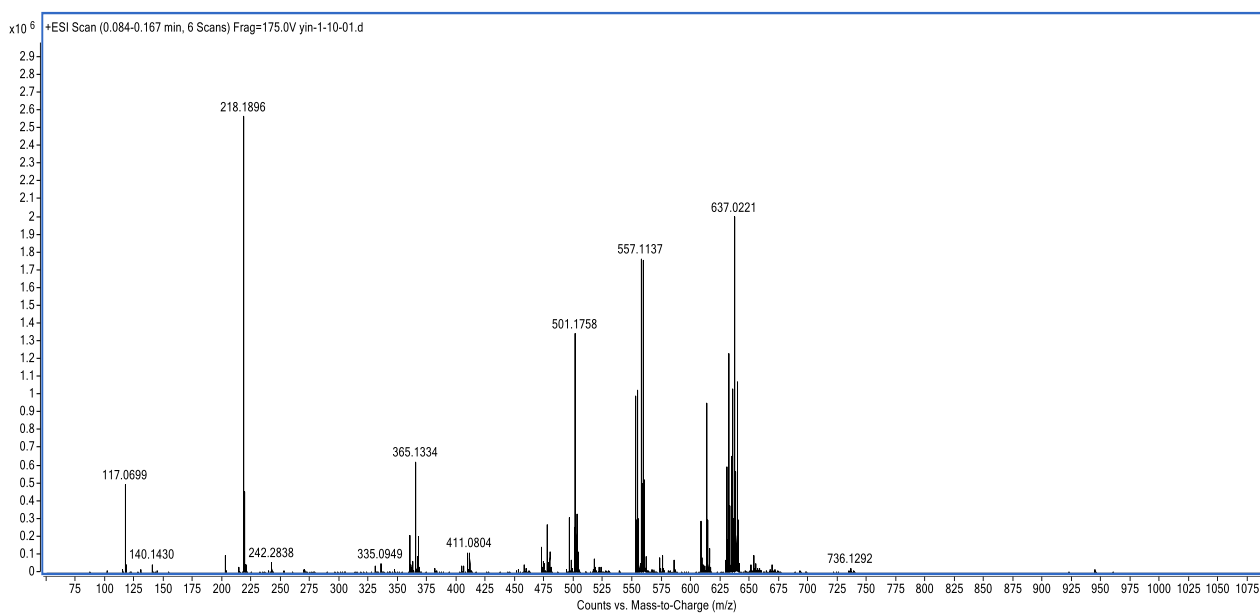

Figure S5. ESI-HR-MS spectrum of **6**.

#### 4. Synthesis of compound **7**

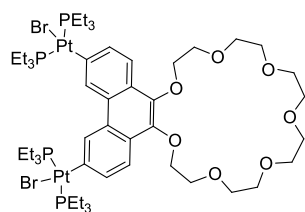

Compound **6** (0.44 g, 0.72 mmol) and Pt(PEt<sub>3</sub>)<sub>4</sub> (1.30 g, 1.95 mmol) were added into a 100 mL Schlenk flask and charged with nitrogen. Freshly distilled toluene (40 mL) was added to the flask under nitrogen by syringe, and the resulting mixture was heated at 95 °C for 72 h. After cooling, the solvent was removed in vacuo to give a crude product, which was purified by flash column chromatography (CH<sub>2</sub>Cl<sub>2</sub>/ethyl acetate, v/v 1:3) to afford **7** as a white solid (0.72 g, 68%). M. P. 248.6–250.5 °C. <sup>1</sup>H NMR (400 MHz, CDCl<sub>3</sub>, 295K): 8.46 (s, 2H), 7.77 (d, *J* = 8.1 Hz, 2H), 7.57 (d, *J* = 8.1 Hz, 2H), 4.41 (t, *J* = 4.3 Hz, 4H), 4.03 (t, *J* = 4.3 Hz, 4H), 3.83–3.88 (m, 4H), 3.77–3.82 (m, 4H), 3.68–3.74 (m, 8H), 1.59–1.73 (m, 24H), 1.01–1.13 (m, 36H). <sup>13</sup>C NMR (100 MHz, CDCl<sub>3</sub>, 295K): 141.3, 137.4, 136.3, 129.2, 128.4, 124.8, 120.7, 72.3, 71.4, 71.3, 71.0, 70.8, 70.8, 14.2, 7.9. ESI-HR-MS: *m/z* 1465.4180 [**7** + H]<sup>+</sup>, calcd. for [C<sub>50</sub>H<sub>91</sub>Br<sub>2</sub>O<sub>7</sub>P<sub>4</sub>Pt<sub>2</sub>]<sup>+</sup>, 1465.3275.



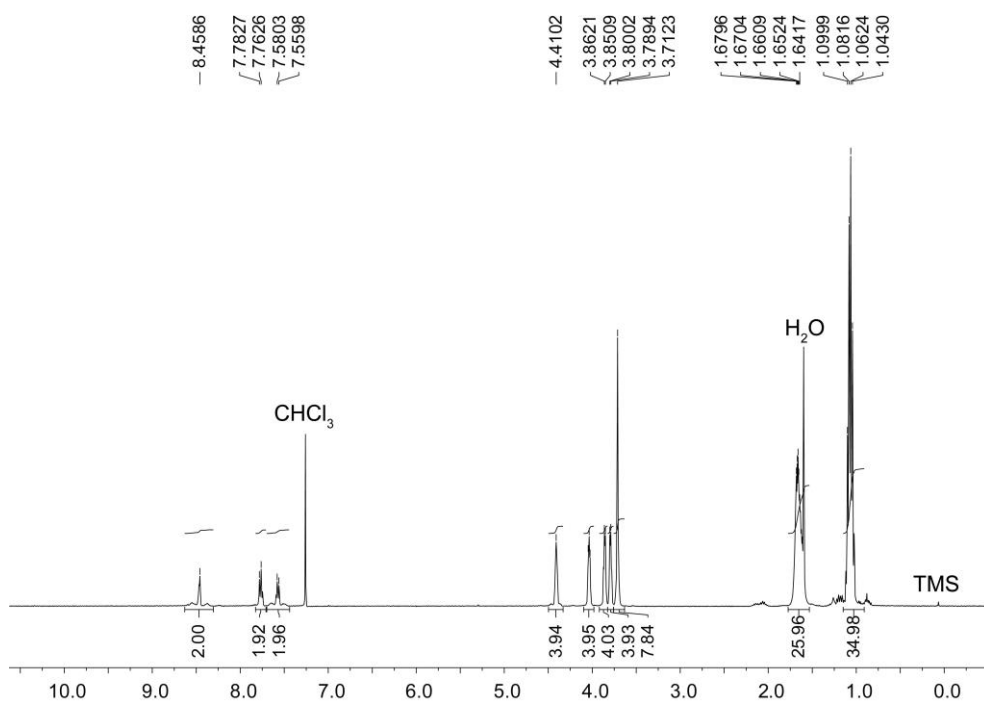

**Figure S6.** <sup>1</sup>H NMR spectrum (400 MHz, CDCl<sub>3</sub>, 295 K) recorded for **7**.

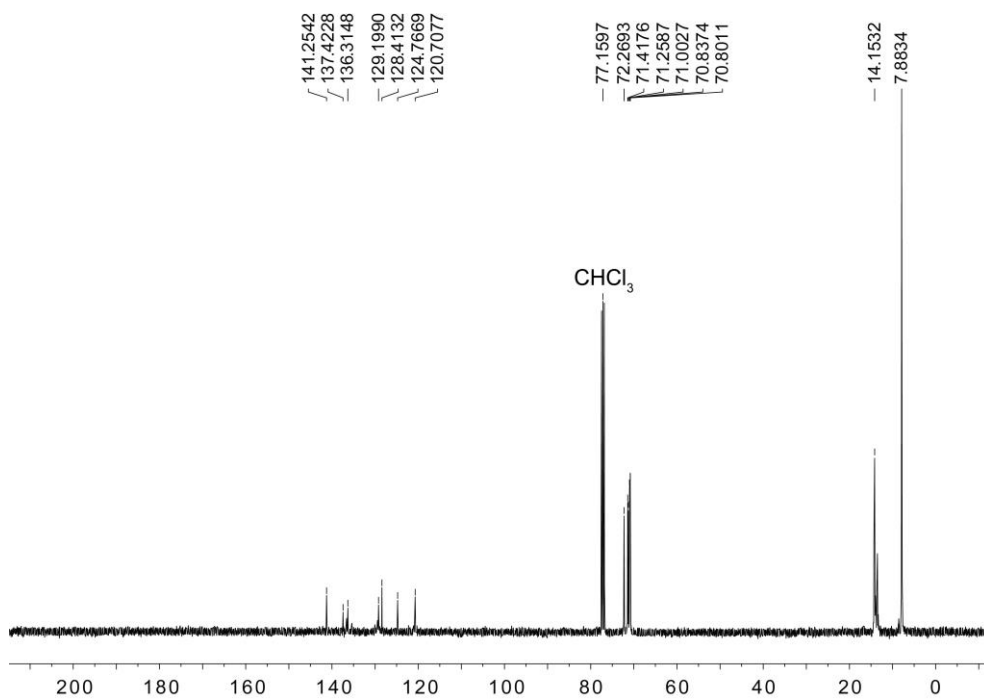

**Figure S7.** <sup>13</sup>C NMR spectrum (100 MHz, CDCl<sub>3</sub>, 295 K) recorded for **7**.

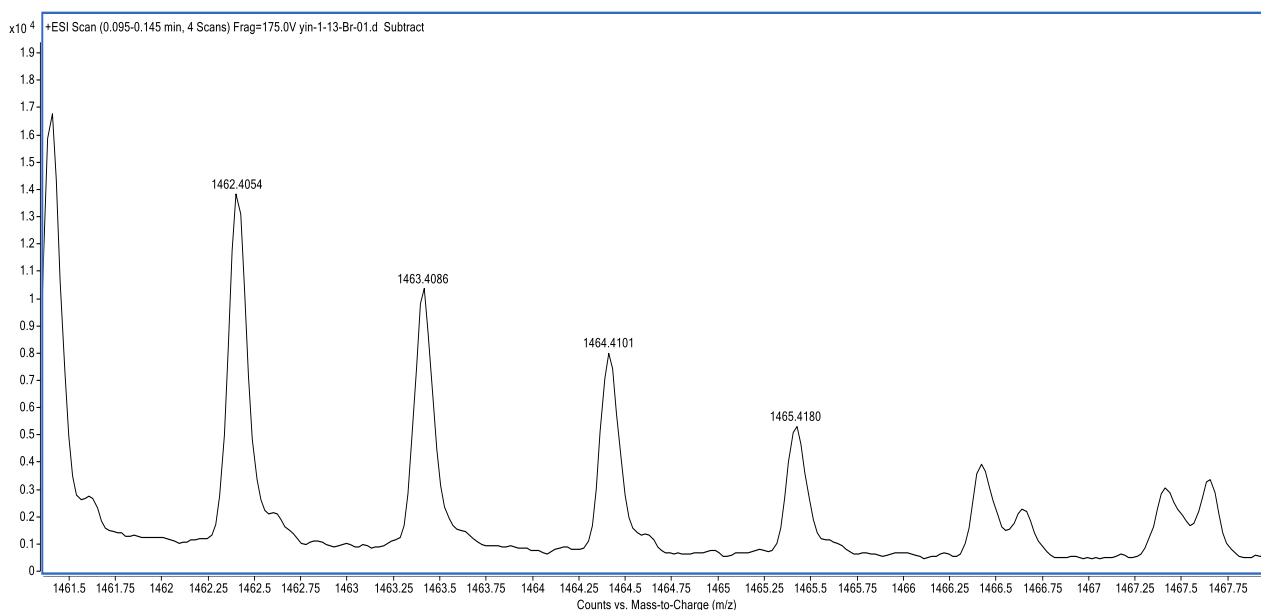

**Figure S8.** Electrospray ionization mass spectrum of **7**.

### 5. Synthesis of compound **8**

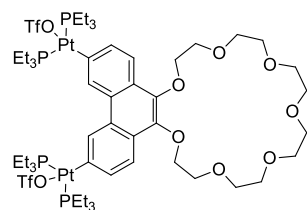

Compound **7** (60 mg, 0.04 mmol) and AgOTf (18 mg, 0.12 mmol) were placed in a 5 mL vial, and then freshly distilled CH<sub>2</sub>Cl<sub>2</sub> (4 mL) was added. The resulting mixture was stirred in the dark at room temperature for 12 h. After filtering off the heavy creamy precipitate, a clear solution was obtained. Then the solvent was removed under a flow of nitrogen to afford **8** as a brown solid (62 mg, 95%). M. P. 216.7–219.3 °C. <sup>1</sup>H NMR (400 MHz, CDCl<sub>3</sub>, 295K): 8.33 (s, 2H), 7.70 (d, *J* = 8.4 Hz, 2H), 7.56 (d, *J* = 8.4 Hz, 2H), 4.40–4.46 (m, 4H), 4.07–4.16 (m, 4H), 3.90–3.98 (m, 4H), 3.72–3.85 (m, 12H), 1.50–1.73 (m, 24H), 1.06–1.20 (m, 36H). <sup>13</sup>C NMR (100 MHz, CDCl<sub>3</sub>, 295K): 141.3, 135.0, 127.9, 125.3, 121.1, 72.1, 71.2, 71.0, 70.8, 70.6, 70.5, 13.6, 7.6. <sup>31</sup>P{<sup>1</sup>H} NMR (121.4 MHz, CD<sub>3</sub>COCD<sub>3</sub>, 295 K) δ (ppm): 17.97 ppm (s, <sup>195</sup>Pt satellites, <sup>1</sup>J<sub>Pt-P</sub> = 2830.5 Hz). ESI-HR-MS: *m/z* 1638.4294 [**8** + Na]<sup>+</sup>, calcd. for [C<sub>52</sub>H<sub>90</sub>F<sub>6</sub>O<sub>13</sub>P<sub>4</sub>Pt<sub>2</sub>Na]<sup>+</sup>, 1638.3872.

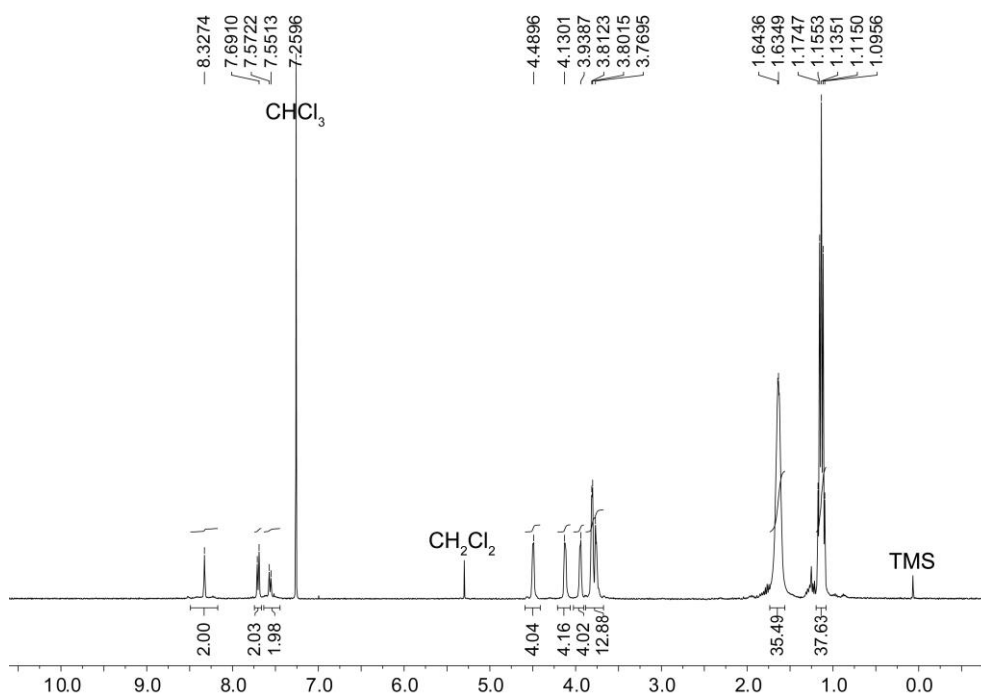

**Figure S9.**  $^1\text{H}$  NMR spectrum (400 MHz,  $\text{CDCl}_3$ , 295 K) recorded for **8**.

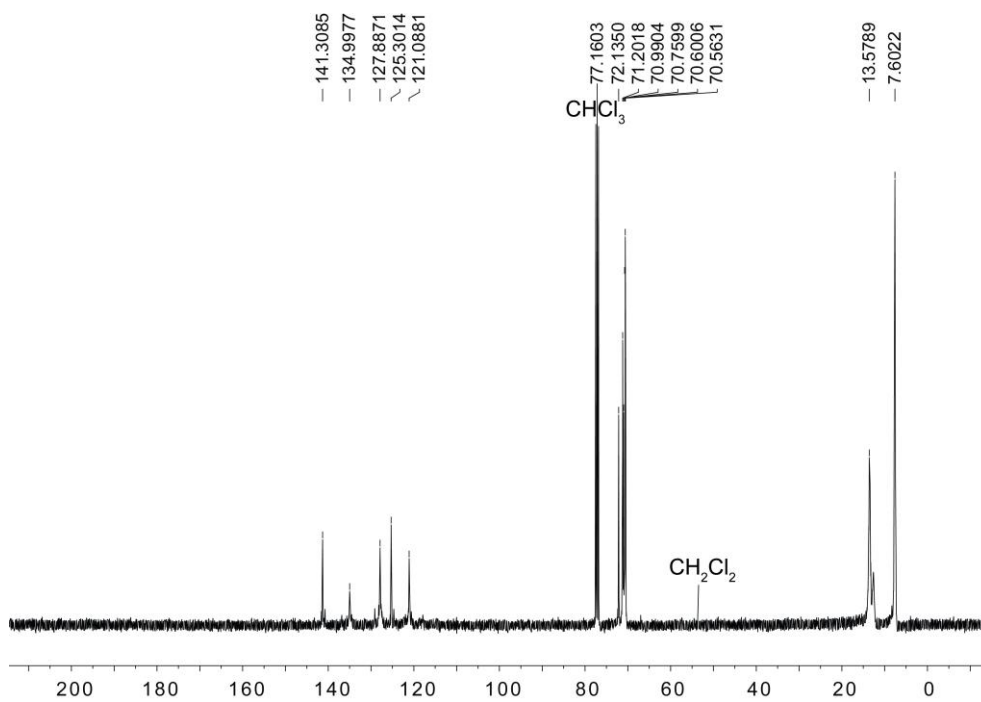

**Figure S10.**  $^{13}\text{C}$  NMR spectrum (100 MHz,  $\text{CDCl}_3$ , 295 K) recorded for **8**.

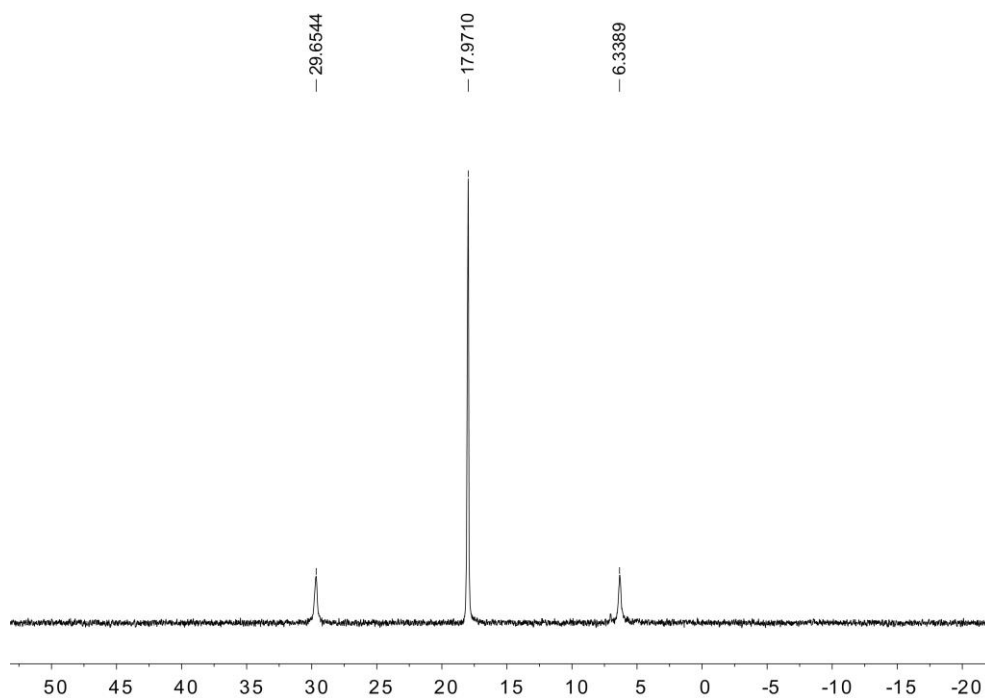

**Figure S11.**  $^{31}\text{P}\{^1\text{H}\}$  NMR spectrum (121.4 MHz,  $\text{CD}_3\text{COCD}_3$ , 295 K) recorded for **8**.

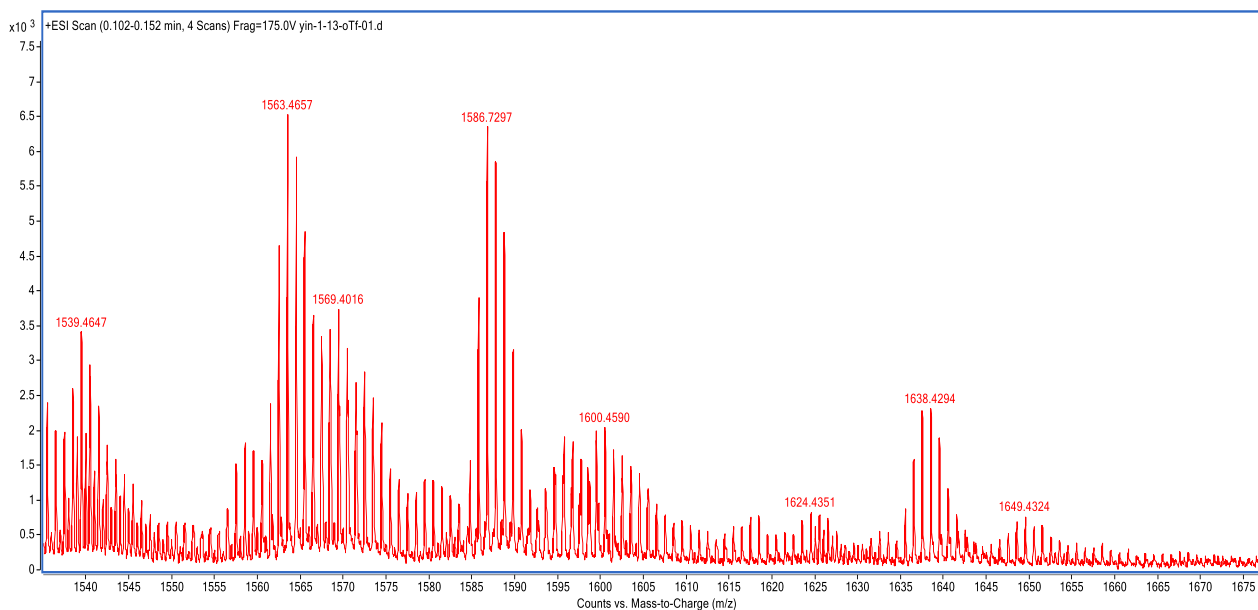

**Figure S12.** Electrospray ionization mass spectrum of **8**.

## 6. Synthesis of Compound **9**

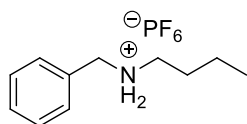

Compound **9** was synthesized according to literature procedure.<sup>S4</sup> The  $^1\text{H}$  NMR of **9** matches well with the reported data.  $^1\text{H}$  NMR (400 MHz,  $\text{CD}_3\text{COCD}_3$ , 295K): 7.55–7.63 (m, 2H), 7.45–7.51 (m, 3H), 4.58 (s, 2H), 3.43 (t,  $J = 7.9$  Hz, 2H), 2.51 (br, 2H,  $\text{NH}_2$ ), 1.82–1.92 (m, 2H), 1.42–1.53 (m, 2H), 0.94 (t,  $J = 7.6$  Hz, 3H).

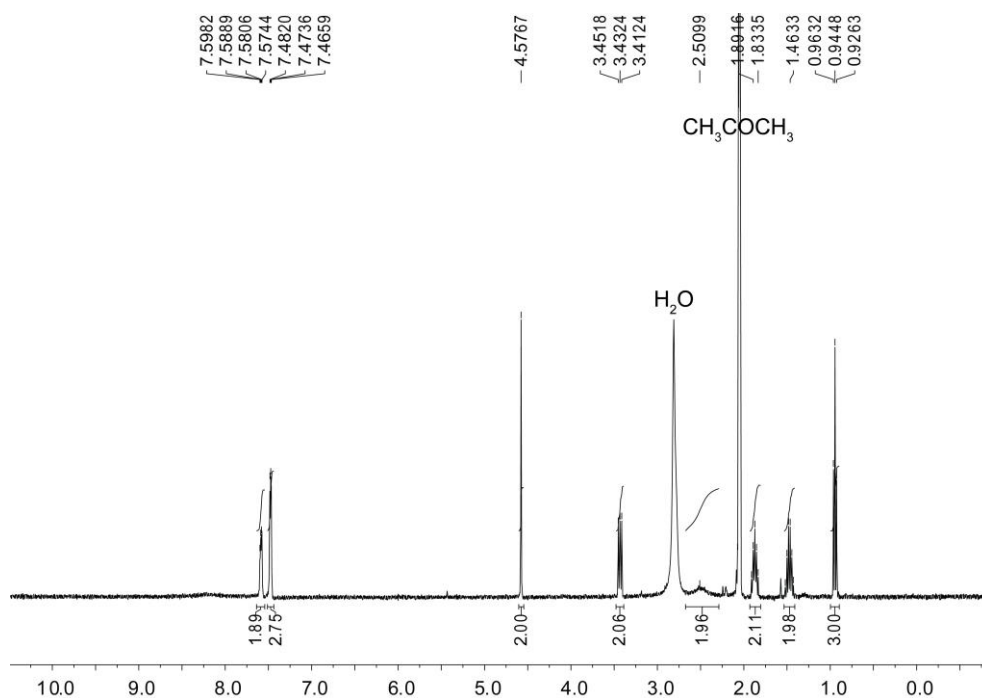

**Figure S13.**  $^1\text{H}$  NMR spectrum (400 MHz,  $\text{CD}_3\text{COCD}_3$ , 295 K) recorded for **9**.

## 7. Synthesis of compound **10**

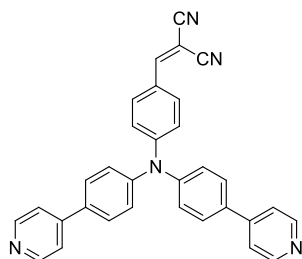

Compound **10** was synthesized according to literature procedure.<sup>S5</sup> The  $^1\text{H}$  NMR of **10** matches well with the reported data.  $^1\text{H}$  NMR (400 MHz,  $\text{CH}_2\text{Cl}_2$ , 295K): 8.63 (dd,  $J_1 = 6.1$  Hz,  $J_2 = 1.6$  Hz, 4H), 7.80 (d,  $J = 8.9$  Hz, 2H), 7.68 (d,  $J = 8.6$  Hz, 4H), 7.61 (s, 1H), 7.51 (dd,  $J_1 = 6.1$  Hz,  $J_2 = 1.6$  Hz, 4H), 7.31 (d,  $J = 8.6$  Hz, 4H), 7.11 (d,  $J = 8.9$  Hz, 2H).

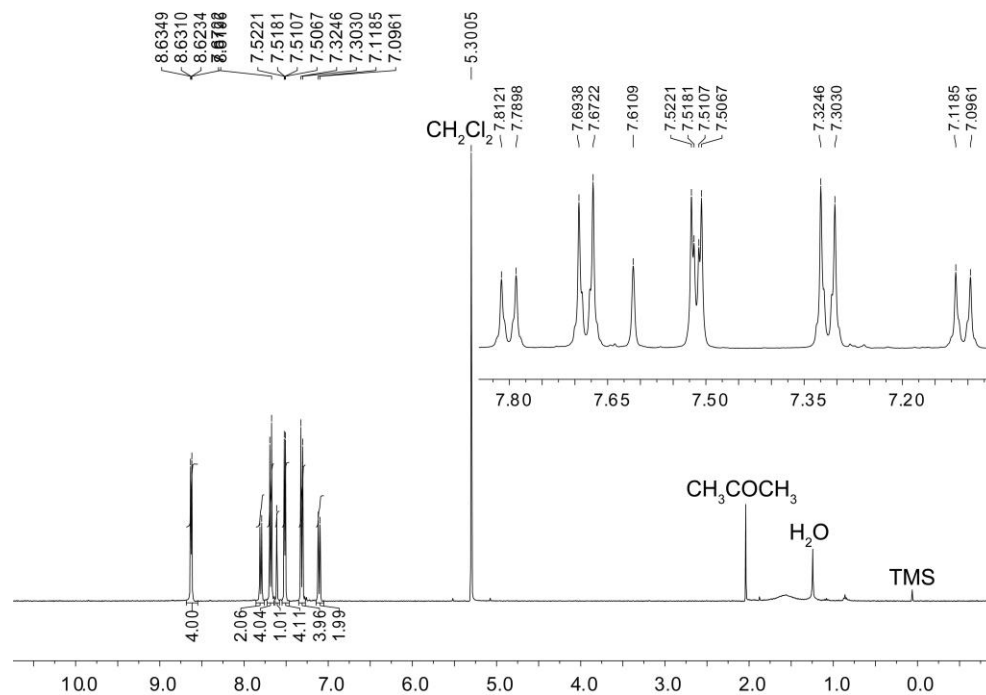

**Figure S14.**  $^1\text{H}$  NMR spectrum (400 MHz,  $\text{CD}_2\text{Cl}_2$ , 295 K) recorded for **10**.

## 8. Synthesis of compound **11**

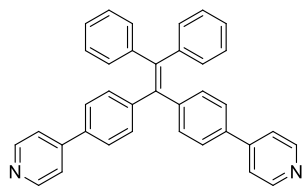

Compound **11** was synthesized according to literature procedure.<sup>S6</sup> The <sup>1</sup>H NMR of **11** matches well with the reported data. <sup>1</sup>H NMR (400 MHz, CD<sub>3</sub>COCD<sub>3</sub>, 295K): 8.60 (d, *J* = 6.0 Hz, 4H), 7.61–7.64 (m, 4H), 7.59–7.61 (m, 4H), 7.22 (d, *J* = 8.5 Hz, 4H), 7.13–7.19 (m, 6H), 7.09–7.13 (m, 4H).

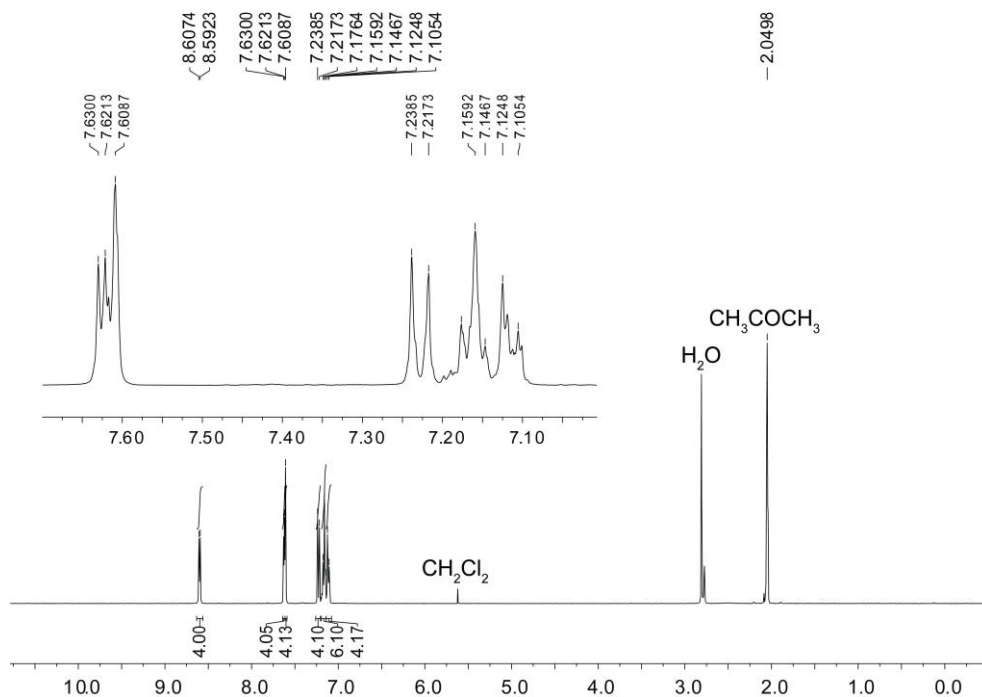

**Figure S15.** <sup>1</sup>H NMR spectrum (400 MHz, CD<sub>3</sub>COCD<sub>3</sub>, 295 K) recorded for **11**.

## 9. Synthesis of compound **12**

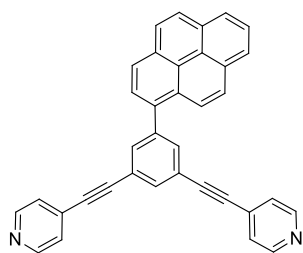

4,4'-(5-bromo-1,3-phenylene)-bis(ethyne-2,1-diyl)dipyridine (430 mg, 1.20 mmol),<sup>S7</sup> 1-pyrenylboronic acid (595 mg, 2.40 mmol), Pd(PPh<sub>3</sub>)<sub>4</sub> (139 mg, 0.12 mmol), and K<sub>2</sub>CO<sub>3</sub> (828 mg, 6.00 mmol) were added into a 100 mL Schlenk flask and then charged with nitrogen. Degassed dioxane (30 mL) and degassed H<sub>2</sub>O (15 mL) were added to the flask under nitrogen by syringe. The reaction mixture was stirred at 90 °C for 48 h under nitrogen atmosphere. After cooling, the product was concentrated and purified by flash column chromatography with CH<sub>2</sub>Cl<sub>2</sub>:CH<sub>3</sub>OH (40:1, v/v) as the eluent to afford compound **12** (513 mg, 89%) as white powder. M. P. 218.7–221.1 °C. <sup>1</sup>H NMR (400 MHz, CD<sub>3</sub>COCD<sub>3</sub>, 295K): 8.65 (dd, *J*<sub>1</sub> = 6.0 Hz, *J*<sub>2</sub> = 1.4 Hz, 4H), 8.41 (d, *J* = 7.8 Hz, 1H), 8.36 (d, *J* = 7.6 Hz, 1H), 8.33 (d, *J* = 7.6 Hz, 1H), 8.26 (s, 2H), 8.24 (d, *J* = 9.4 Hz, 1H), 8.09–8.18 (m, 3H), 7.98 (t, *J* = 1.4 Hz, 1H), 7.94 (d, *J* = 1.4 Hz, 2H), 7.54 (dd, *J*<sub>1</sub> = 6.0 Hz, *J*<sub>2</sub> = 1.4 Hz, 4H). <sup>13</sup>C NMR (100 MHz, CDCl<sub>3</sub>, 295K): 149.9, 142.2, 135.0, 134.4, 133.8, 131.4, 131.1, 130.9, 130.8, 128.4, 128.2, 127.9, 127.3, 126.3, 125.5, 124.9, 124.8, 124.4, 123.0, 92.7, 87.8. HR-MS: *m/z* 481.1705 ([**12** + H]<sup>+</sup>, calcd. for [C<sub>36</sub>H<sub>21</sub>N<sub>2</sub>]<sup>+</sup>, 481.2626).

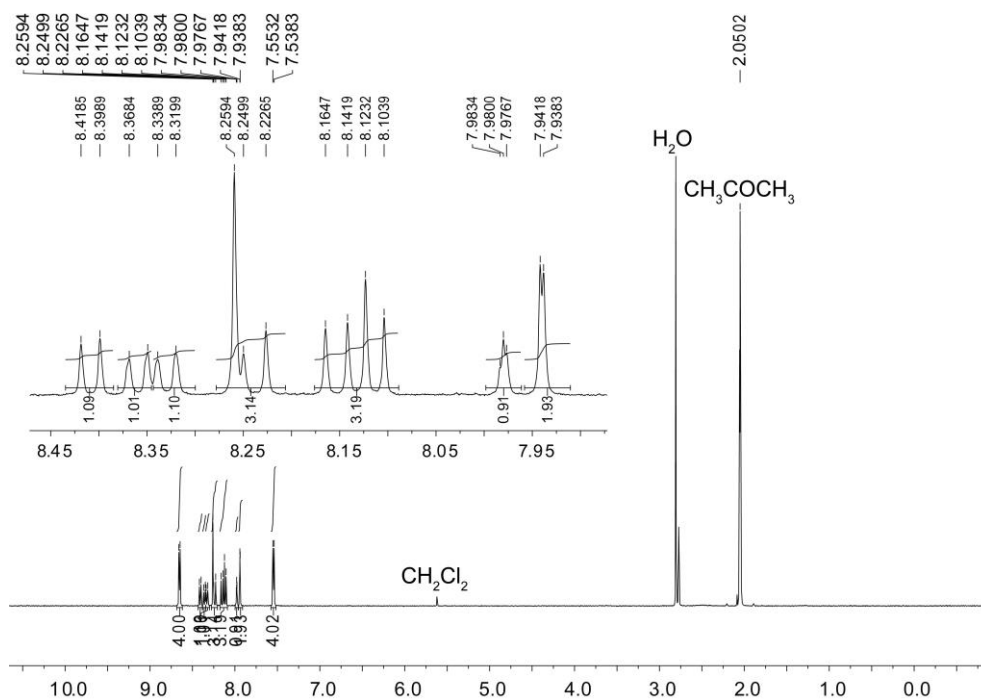

**Figure S16.** <sup>1</sup>H NMR spectrum (400 MHz, CD<sub>3</sub>COCD<sub>3</sub>, 295 K) recorded for **12**.

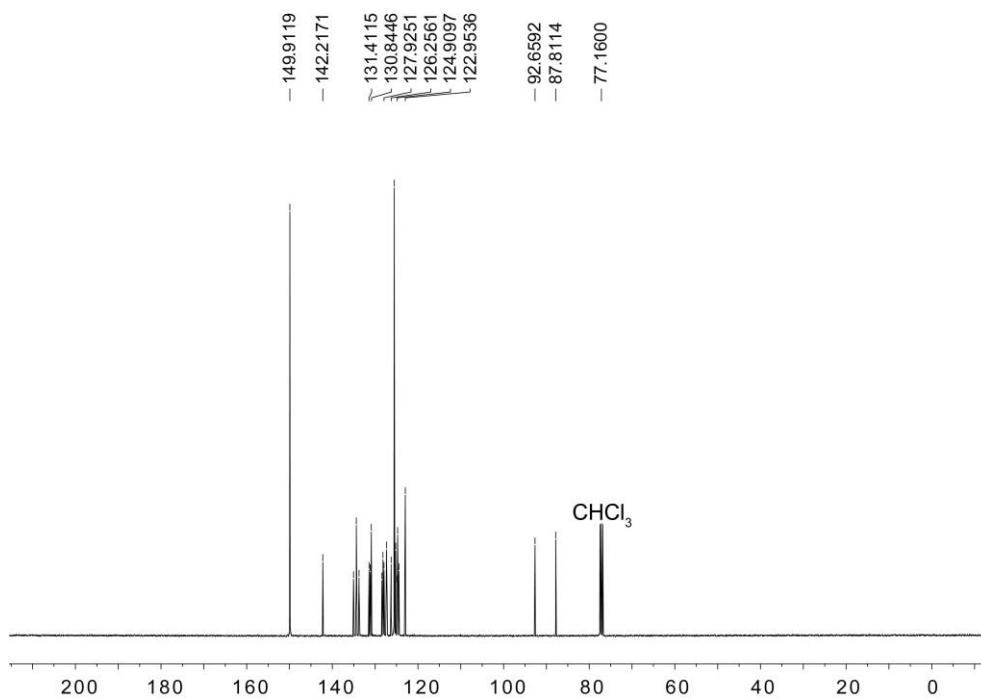

**Figure S17.** <sup>13</sup>C NMR spectrum (100 MHz, CDCl<sub>3</sub>, 295 K) recorded for **12**.

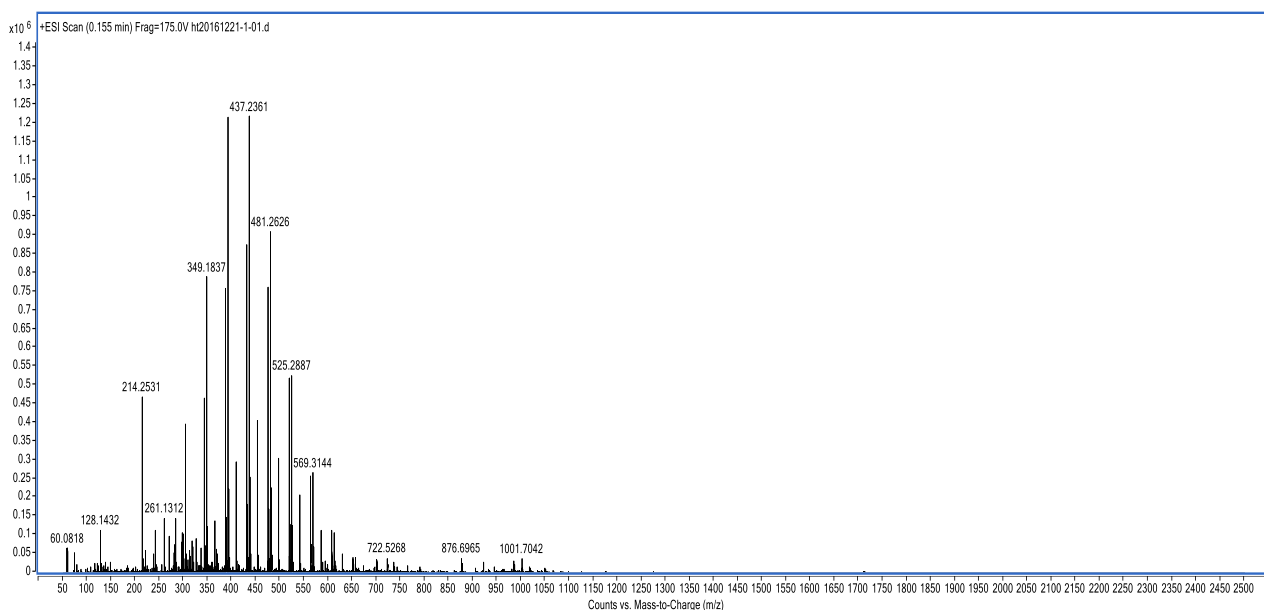

**Figure S18.** Electrospray ionization mass spectrum of **12**.

### 10. Synthesis of rhomboidal metallacycle **1**

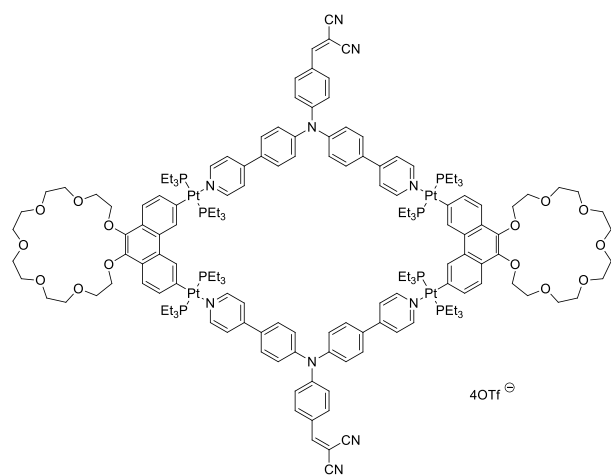

Compound **8** (30.39 mg, 18.81  $\mu\text{mol}$ ) and **10** (8.95 mg, 18.81  $\mu\text{mol}$ ) were dissolved in dry  $\text{CH}_2\text{Cl}_2$  (2.0 mL) in a 5 mL vial. The reaction mixture was stirred for 12 h at room temperature. Diethyl ether (10 mL) was added to the resulting homogeneous solution to precipitate the product. The obtained product was dried under reduced pressure as a red solid (36.58 mg, 93%).  $^1\text{H}$  NMR (400 MHz,  $\text{CD}_3\text{COCD}_3$ , 295K): 9.11 (dd,  $J_1 = 12.1$  Hz,  $J_2 = 5.4$  Hz, 8H), 8.70 (s, 4H), 8.18 (d,  $J = 5.6$  Hz, 8H), 8.01–8.23 (m, 18H), 7.82 (d,  $J = 8.5$  Hz, 4H), 7.49 (d,  $J = 7.8$  Hz, 8H), 7.29 (d,  $J = 7.8$  Hz, 4H),

4.37–4.48 (m, 8H), 3.97–4.07 (m, 8H), 3.74–3.83 (m, 8H), 3.69–3.74 (m, 8H), 3.56–3.68 (m, 16H), 1.41–1.66 (m, 48H), 1.15–1.34 (m, 72H).  $^{31}\text{P}\{^1\text{H}\}$  NMR (121.4 MHz,  $\text{CD}_3\text{COCD}_3$ , 295 K)  $\delta$  (ppm): 14.17 ppm (s,  $^{195}\text{Pt}$  satellites,  $^1J_{\text{Pt-P}} = 2674.2$  Hz). ESI-TOF-MS:  $m/z$  896.3092 [**1** – 4OTf] $^{4+}$ , 1244.7423 [**1** – 3OTf] $^{3+}$ , 1941.5898 [**1** – 2OTf] $^{2+}$ .



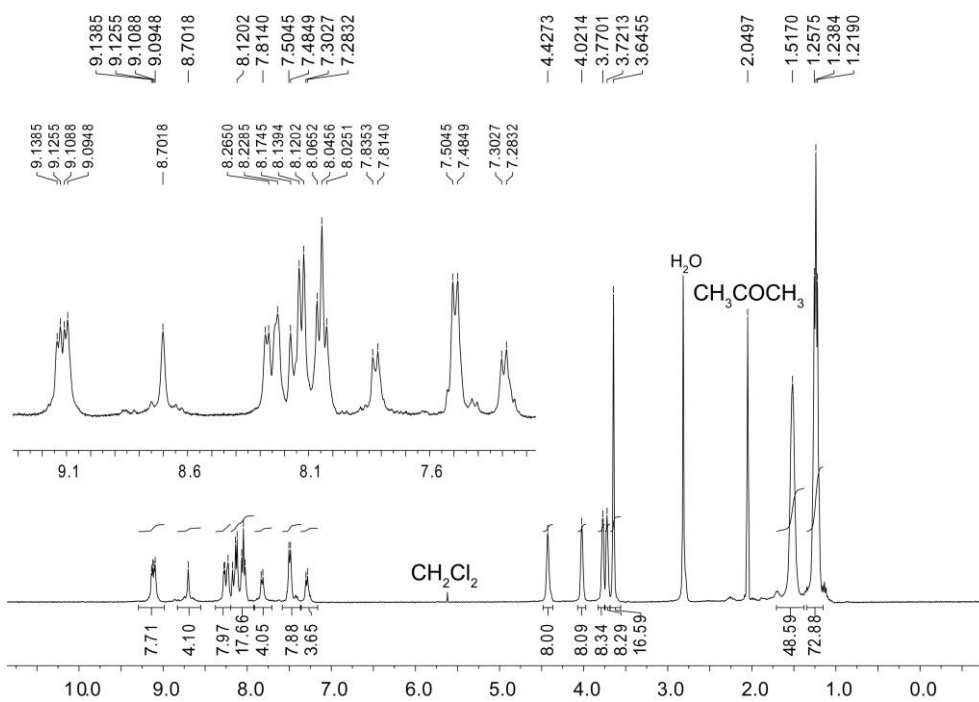

**Figure S19.**  $^1\text{H}$  NMR spectrum (400 MHz,  $\text{CD}_3\text{COCD}_3$ , 295 K) recorded for **1**.

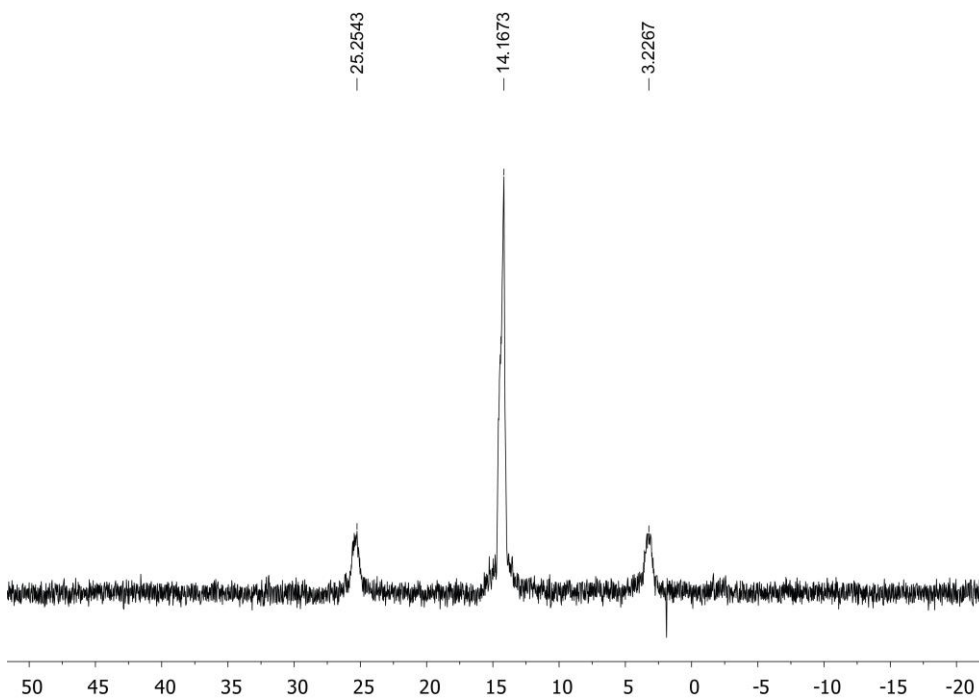

**Figure S20.**  $^{31}\text{P}\{^1\text{H}\}$  NMR spectrum (121.4 MHz,  $\text{CD}_3\text{COCD}_3$ , 295 K) recorded for **1**.

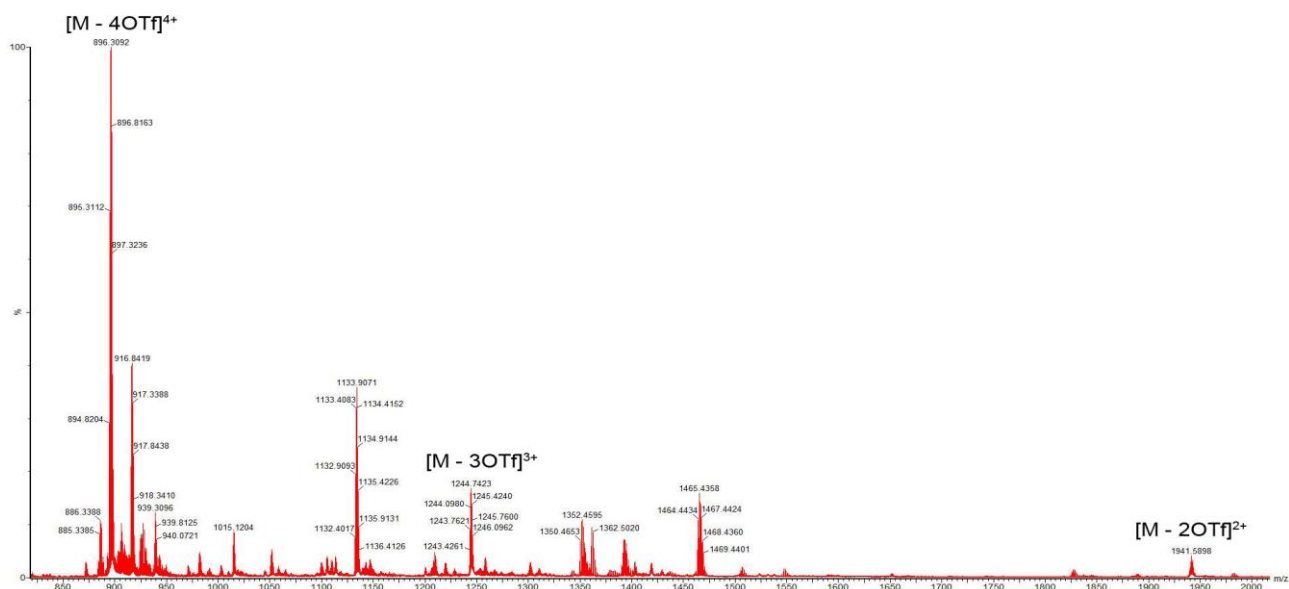

Figure S21. ESI-TOF-MS of **1**.

### 11. Synthesis of rhomboidal metallacycle **2**

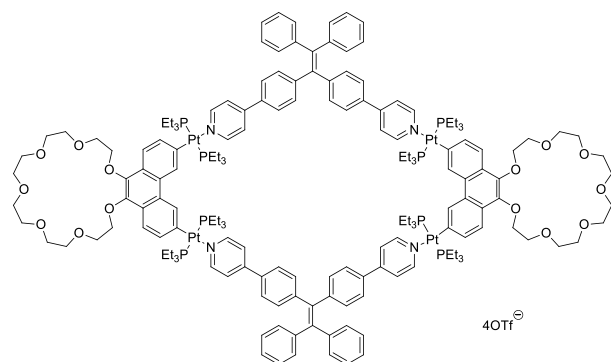

Compound **8** (30.39 mg, 18.81  $\mu\text{mol}$ ) and **11** (9.15 mg, 18.81  $\mu\text{mol}$ ) were dissolved in dry  $\text{CH}_2\text{Cl}_2$  (2.0 mL) in a 5 mL vial. The reaction mixture was stirred for 12 h at room temperature. Diethyl ether (10 mL) was added to the resulting homogeneous solution to precipitate the product. The obtained product was dried under reduced pressure as a yellow solid (37.96 mg, 96%).  $^1\text{H}$  NMR (400 MHz,  $\text{CD}_3\text{COCD}_3$ , 295K): 9.06 (t,  $J = 6.2$  Hz, 8H), 8.68 (s, 4H),

8.15 (dd,  $J_1 = 16.7$  Hz,  $J_2 = 5.3$  Hz, 8H), 8.04 (d,  $J = 8.4$  Hz, 4H), 7.86 (d,  $J = 8.2$  Hz, 8H), 7.82 (d,  $J = 8.6$  Hz, 4H), 7.33 (d,  $J = 8.2$  Hz, 8H), 7.10–7.29 (m, 20H), 4.37–4.52 (m, 8H), 3.98–4.08 (m, 8H), 3.75–3.82 (m, 8H), 3.68–3.75 (m, 8H), 3.61–3.68 (m, 16H), 1.41–1.62 (m, 48H), 1.14–1.30 (m, 72H).  $^{31}\text{P}\{^1\text{H}\}$  NMR (121.4 MHz,  $\text{CD}_3\text{COCD}_3$ , 295 K)  $\delta$  (ppm): 14.69 ppm (s,  $^{195}\text{Pt}$  satellites,  $^1J_{\text{Pt-P}} = 2784.6$  Hz). ESI-TOF-MS:  $m/z$  901.3514 [**2** - 4OTf] $^{4+}$ , 1252.1193 [**2** - 3OTf] $^{3+}$ , 1952.6388 [**2** - 2OTf] $^{2+}$ .

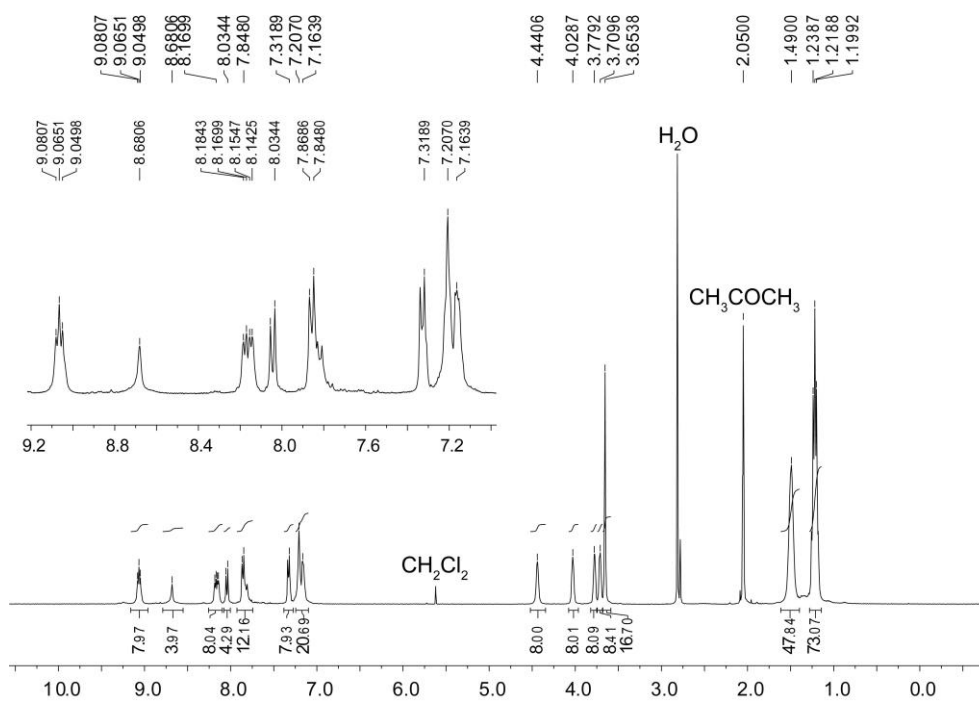

**Figure S22.**  $^1\text{H}$  NMR spectrum (400 MHz,  $\text{CD}_3\text{COCD}_3$ , 295 K) recorded for **2**.

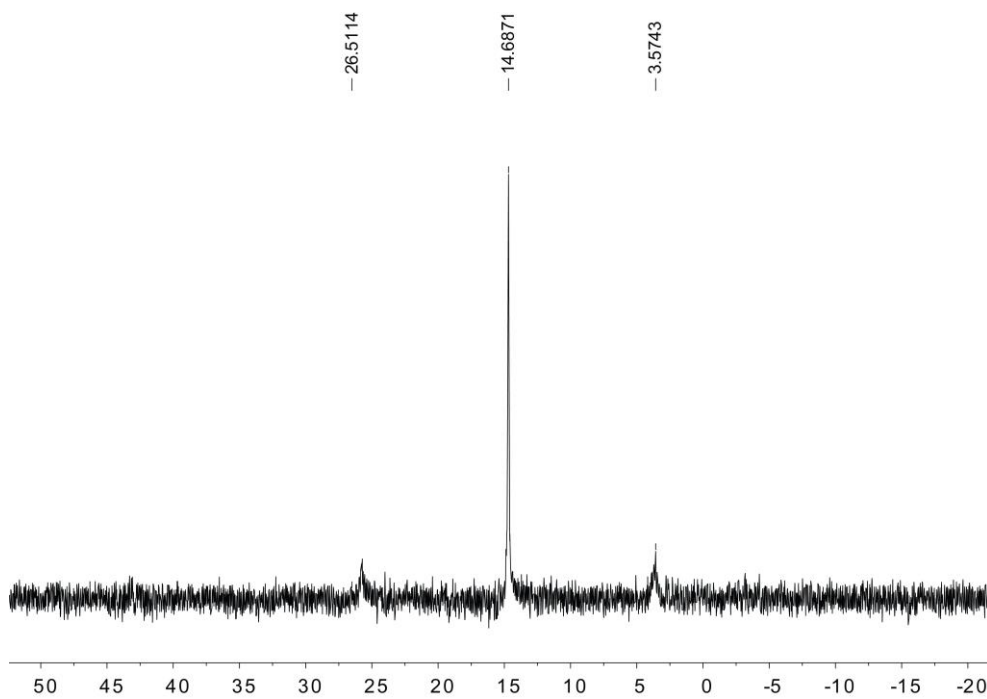

**Figure S23.**  $^{31}\text{P}\{^1\text{H}\}$  NMR spectrum (121.4 MHz,  $\text{CD}_3\text{COCD}_3$ , 295 K) recorded for **2**.

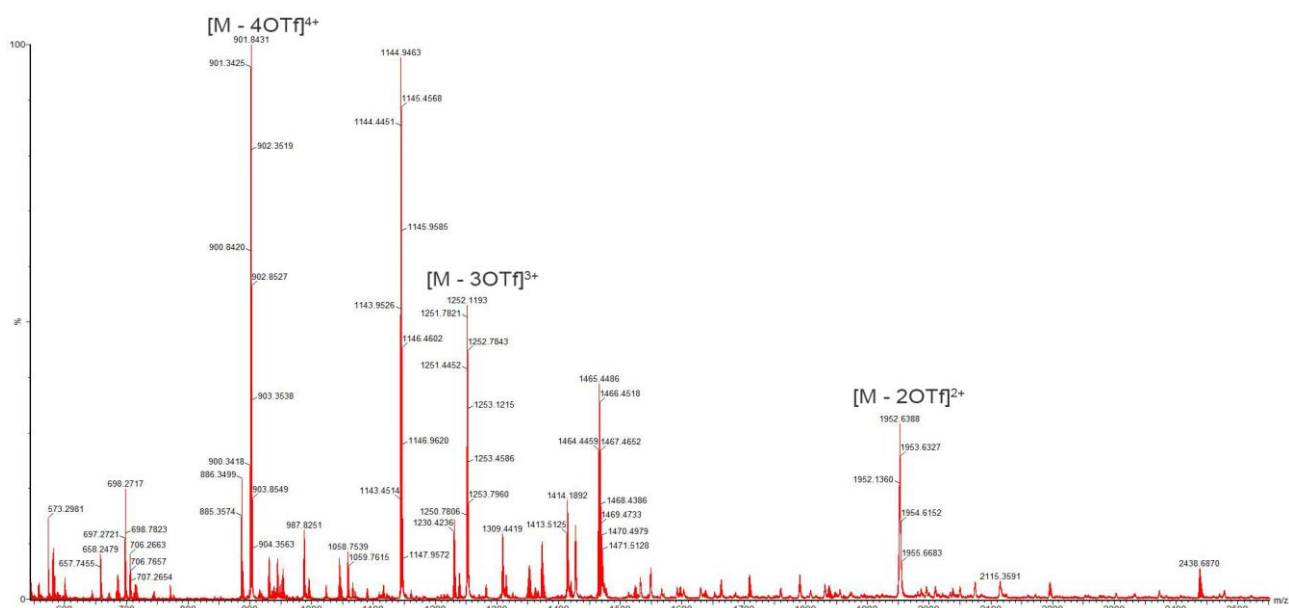

Figure S24. ESI-TOF-MS of **2**.

## 12. Synthesis of rhomboidal metallacycle **3**

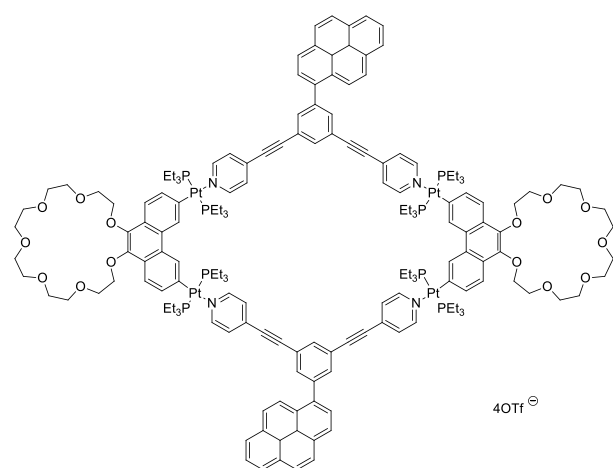

Compound **8** (30.39 mg, 18.81  $\mu\text{mol}$ ) and **12** (9.08 mg, 18.81  $\mu\text{mol}$ ) were dissolved in dry  $\text{CH}_2\text{Cl}_2$  (2.0 mL) in a 5 mL vial. The reaction mixture was stirred for 12 h at room temperature. Diethyl ether (10 mL) was added to the resulting homogeneous solution to precipitate the product. The obtained product was dried under reduced pressure as a yellow solid (35.48 mg, 90%).  $^1\text{H}$  NMR (400 MHz,  $\text{CD}_3\text{COCD}_3$ , 295K): 9.09–9.30 (m, 8H), 8.69 (s, 4H), 8.21–8.47 (m, 12H), 7.94–8.18 (m, 24H), 7.79 (d,  $J = 7.0$  Hz, 4H), 4.35–4.50 (m, 8H), 3.97–4.07 (m, 8H), 3.74–3.82 (m,

8H), 3.67–3.74 (m, 8H), 3.57–3.67 (m, 16H), 1.36–1.61 (m, 48H), 1.07–1.31 (m, 72H).  $^{31}\text{P}\{^1\text{H}\}$  NMR (121.4 MHz,  $\text{CD}_3\text{COCD}_3$ , 295 K)  $\delta$  (ppm): 13.89 ppm (s,  $^{195}\text{Pt}$  satellites,  $^1J_{\text{Pt-P}} = 2655.5$  Hz). ESI-TOF-MS:  $m/z$  898.3780 [**3** – 4OTf] $^{4+}$ , 1247.4213 [**3** – 3OTf] $^{3+}$ , 1945.6079 [**3** – 2OTf] $^{2+}$ .

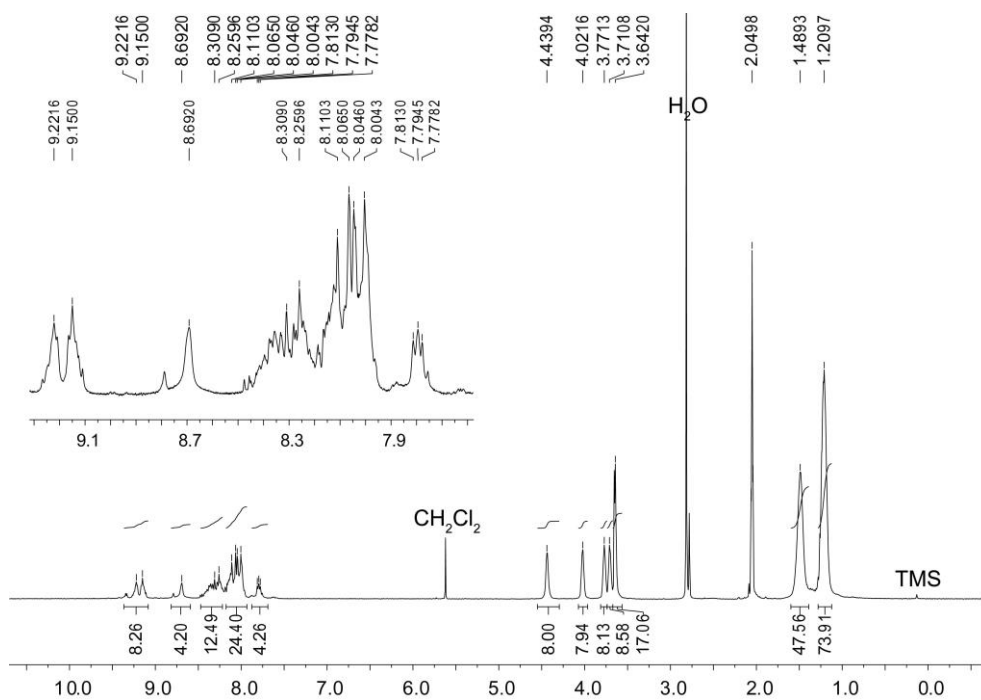

**Figure S25.** <sup>1</sup>H NMR spectrum (400 MHz, CD<sub>3</sub>COCD<sub>3</sub>, 295 K) recorded for **3**.

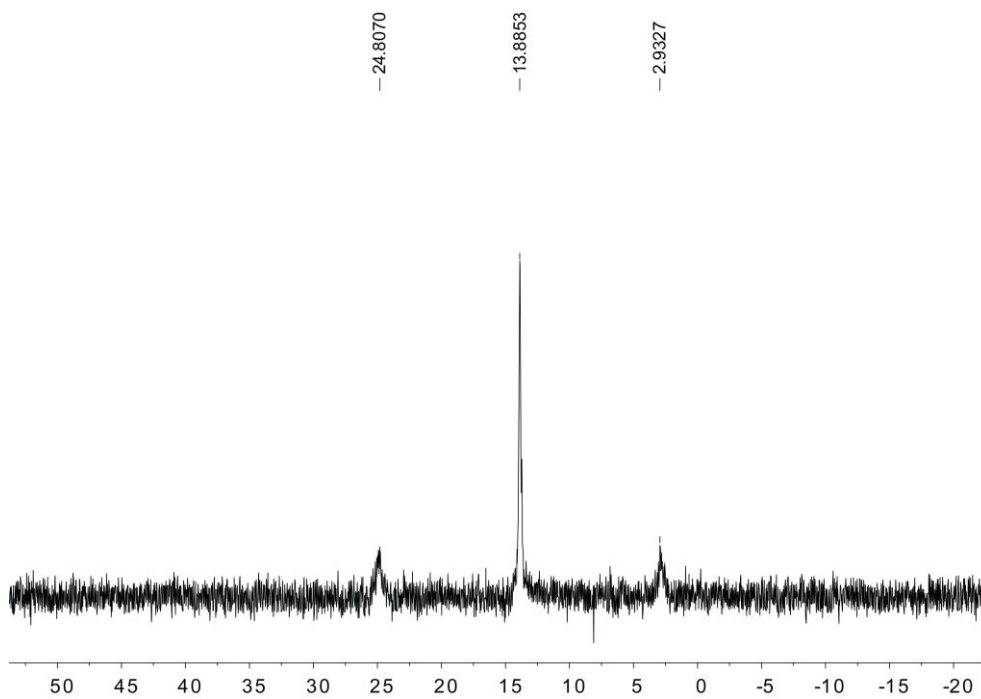

**Figure S26.** <sup>31</sup>P{<sup>1</sup>H} NMR spectrum (121.4 MHz, CD<sub>3</sub>COCD<sub>3</sub>, 295 K) recorded for **3**.

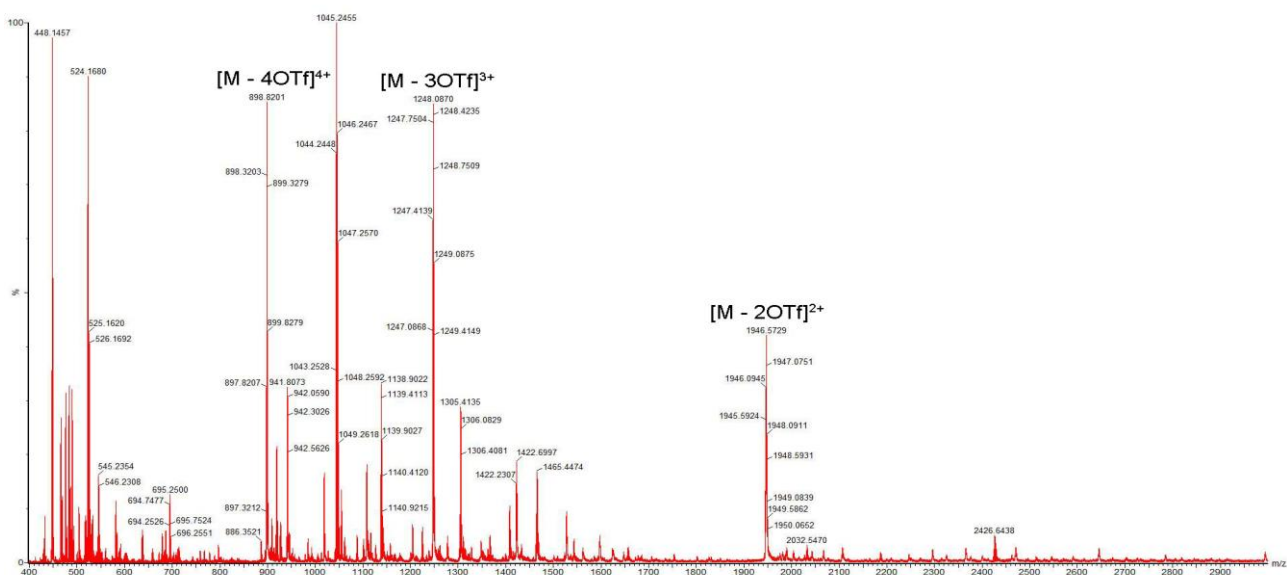

**Figure S26.** ESI-TOF-MS of **3**.

### 13. Synthesis of compound **14**

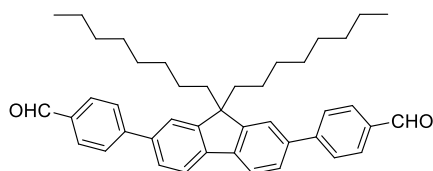

Compound **13** (1.09 g, 2.0 mmol), (4-formylphenyl)boronic acid (0.90 g, 6.0 mmol), Pd(PPh<sub>3</sub>)<sub>4</sub> (0.23 g, 0.2 mmol), and K<sub>2</sub>CO<sub>3</sub> (2.76 g, 20.0 mmol) were added into a 100 mL Schlenk flask and then charged with nitrogen. Degassed dioxane (60 mL) and H<sub>2</sub>O (30 mL) were added to the flask under nitrogen by syringe. The reaction mixture was stirred at 90 °C for 48 h under nitrogen atmosphere. After cooling, the product was concentrated and purified by flash column chromatography with CH<sub>2</sub>Cl<sub>2</sub>:hexane (1:2, v/v) as the eluent to afford compound **13** (0.75 g, 63%) as white powder. M. P. 76.3–78.6 °C. <sup>1</sup>H NMR (400 MHz, CD<sub>2</sub>Cl<sub>2</sub>, 295K): 10.19 (s, 4H), 7.99 (d, *J* = 8.3 Hz, 4H), 7.81–7.89 (m, 6H), 7.62–7.70 (m, 4H), 2.03–2.18 (m, 4H), 1.00–1.34 (m, 24H), 0.79 (t, *J* = 7.2 Hz, 6H). <sup>13</sup>C NMR (100 MHz, CDCl<sub>3</sub>, 295K): 191.1, 151.3, 146.3, 140.0, 138.0, 134.2, 129.4, 126.8, 125.7, 120.8, 119.6, 54.6, 39.4, 30.8, 29.0, 28.2, 22.9, 21.7, 13.1. ESI-HR-MS: *m/z* 599.3895 [**14** + H]<sup>+</sup>, calcd. for [C<sub>43</sub>H<sub>51</sub>O<sub>2</sub>]<sup>+</sup>, 599.3889.

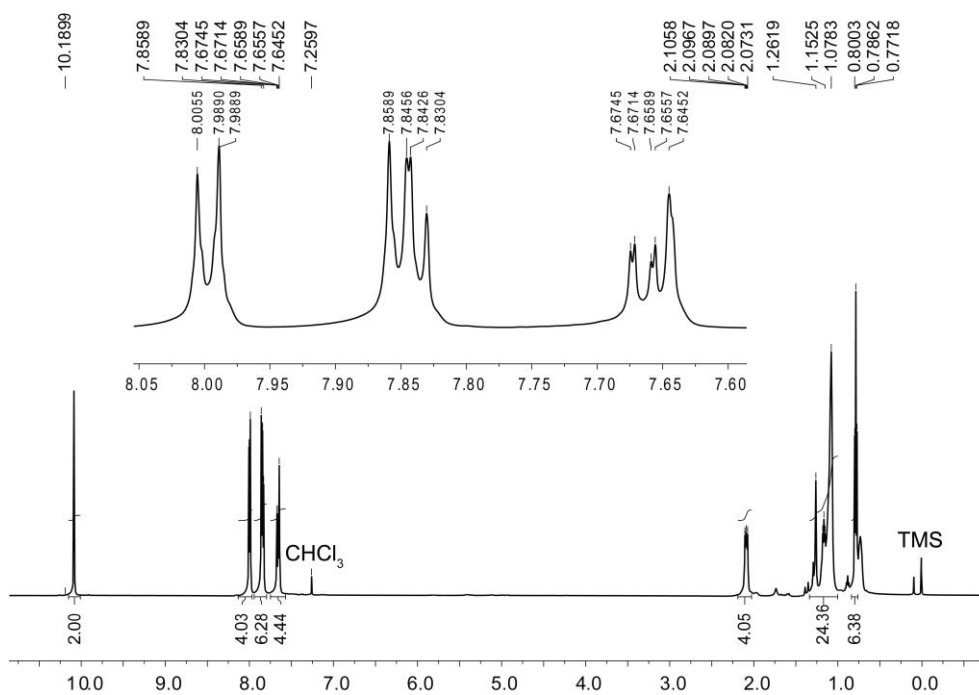

**Figure S28.** <sup>1</sup>H NMR spectrum (500 MHz, CDCl<sub>3</sub>, 295 K) recorded for **14**.

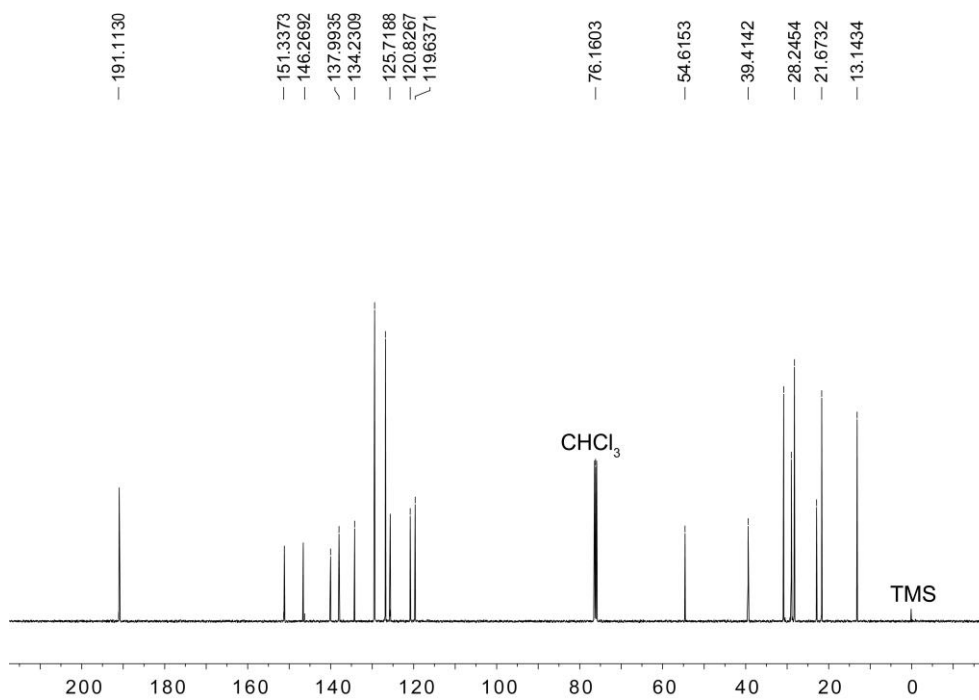

**Figure S29.** <sup>13</sup>C NMR spectrum (125 MHz, CDCl<sub>3</sub>, 295 K) recorded for **14**.

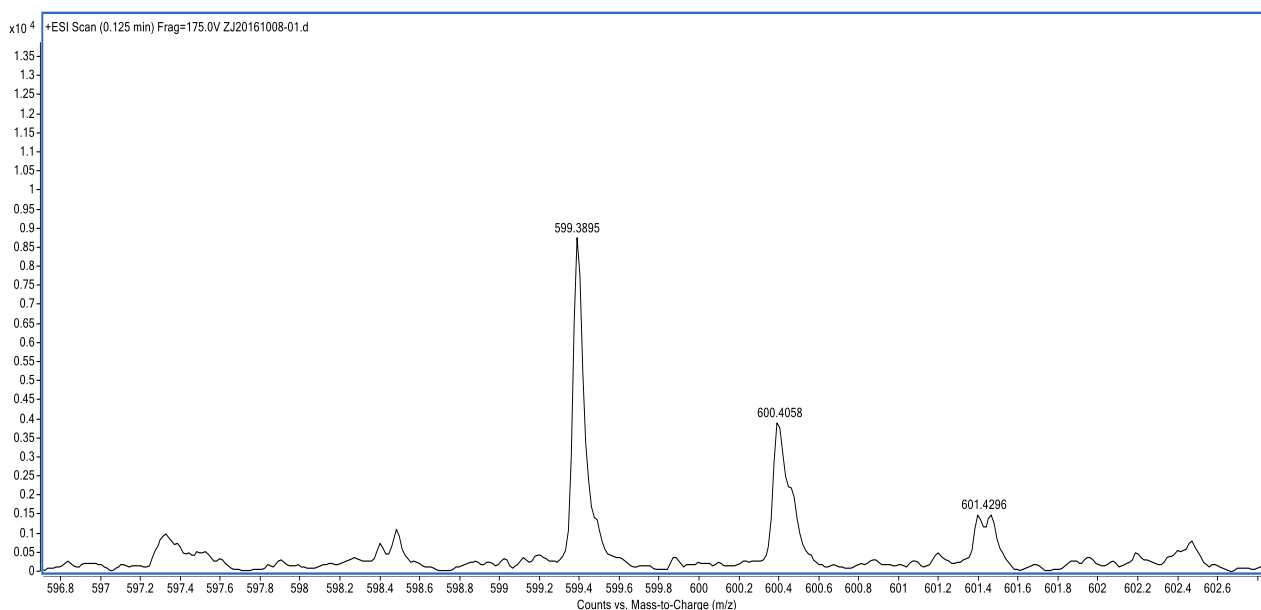

**Figure S30.** Electrospray ionization mass spectrum of **14**.

#### 14. Synthesis of bis-ammonium salt **4**

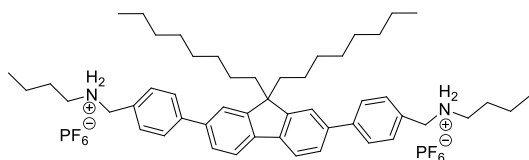

Compound **14** (1.20 g, 2.00 mmol) and *n*-butylamine (0.29 g, 4.00 mmol) were dissolved into CH<sub>3</sub>OH (100 mL) and then the reaction mixture was heated at reflux for 12 h. After cooling to room temperature, NaBH<sub>4</sub> (0.23 g, 6.00 mol) was slowly added to the

above solution. The mixture was stirred at room temperature for another 24 h. HCl (1 mol/L, 20 mL) was added to the reaction mixture until there is no more precipitate comes out. The precipitate was filtered and dissolved in water. Then saturated aqueous NH<sub>4</sub>PF<sub>6</sub> solution was added to give a precipitate which was collected and washed with large excess of water to afford **4** (0.54 g, 27% in four steps) as a white solid. M. P.: 237.5–239.3 °C. <sup>1</sup>H NMR (400 MHz, DMSO, 295K): 9.02 (br, 4H, NH<sub>2</sub>), 7.92 (d, *J* = 7.9 Hz, 2H), 7.82 (d, *J* = 7.9 Hz, 4H), 7.79 (s, 2H), 7.69 (d, *J* = 7.9 Hz, 2H), 7.64 (d, *J* = 7.9 Hz, 4H), 4.20 (s, 4H), 2.81–3.04 (m, 4H), 1.98–2.21 (m, 4H), 1.55–1.71 (m, 4H), 1.27–1.42 (m, 4H), 0.92–1.25 (m, 20H), 0.90 (t, *J* = 7.3 Hz, 6H), 0.72 (t, *J* = 6.9 Hz, 6H), 0.48–0.65 (m, 4H). <sup>13</sup>C NMR (100 MHz, DMSO, 295K): 151.4, 140.9, 139.9, 138.4, 130.9, 130.6, 126.9, 125.8, 121.1, 120.5, 55.1, 49.6, 46.1, 31.1, 29.1, 28.4, 27.4, 23.3, 22.0, 19.3, 13.9, 13.5. ESI-HR-MS: *m/z* 1003.5049 [**4** - H]<sup>-</sup>, calcd. for [C<sub>51</sub>H<sub>73</sub>F<sub>12</sub>N<sub>2</sub>P<sub>2</sub>]<sup>-</sup>, 1003.5057.



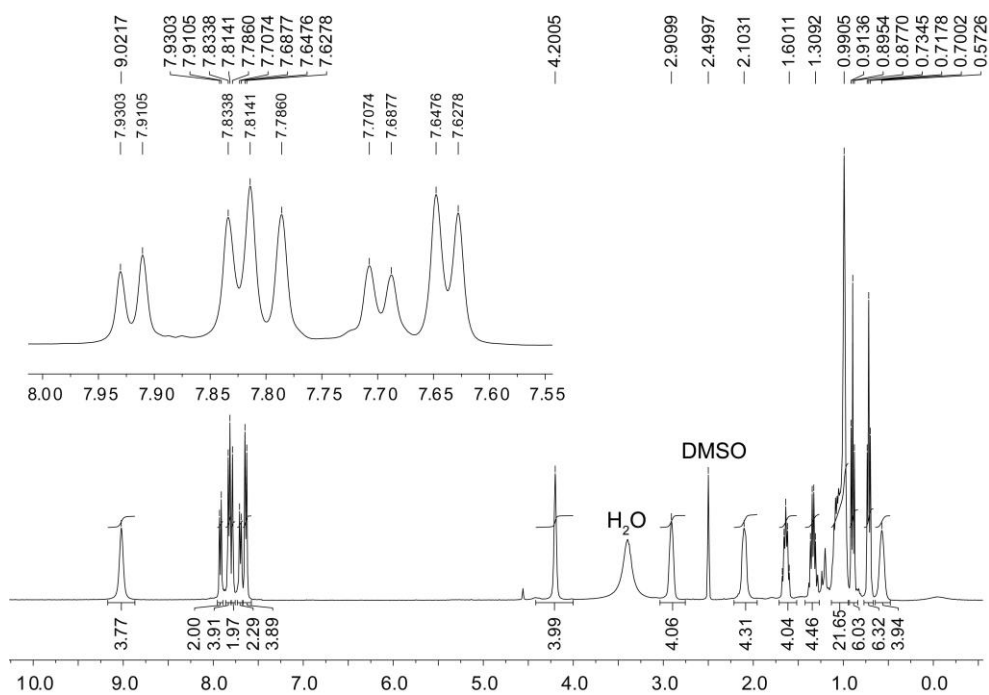

**Figure S31.**  $^1\text{H}$  NMR spectrum (400 MHz, DMSO, 295 K) recorded for **4**.

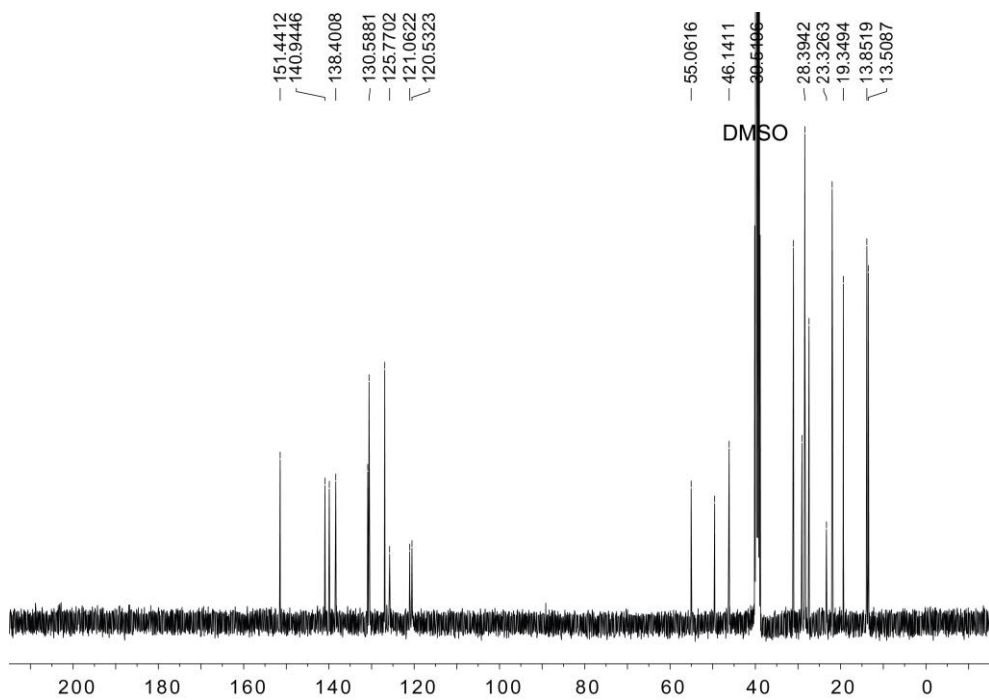

**Figure S32.**  $^{13}\text{C}$  NMR spectrum (100 MHz, DMSO, 295 K) recorded for **4**.

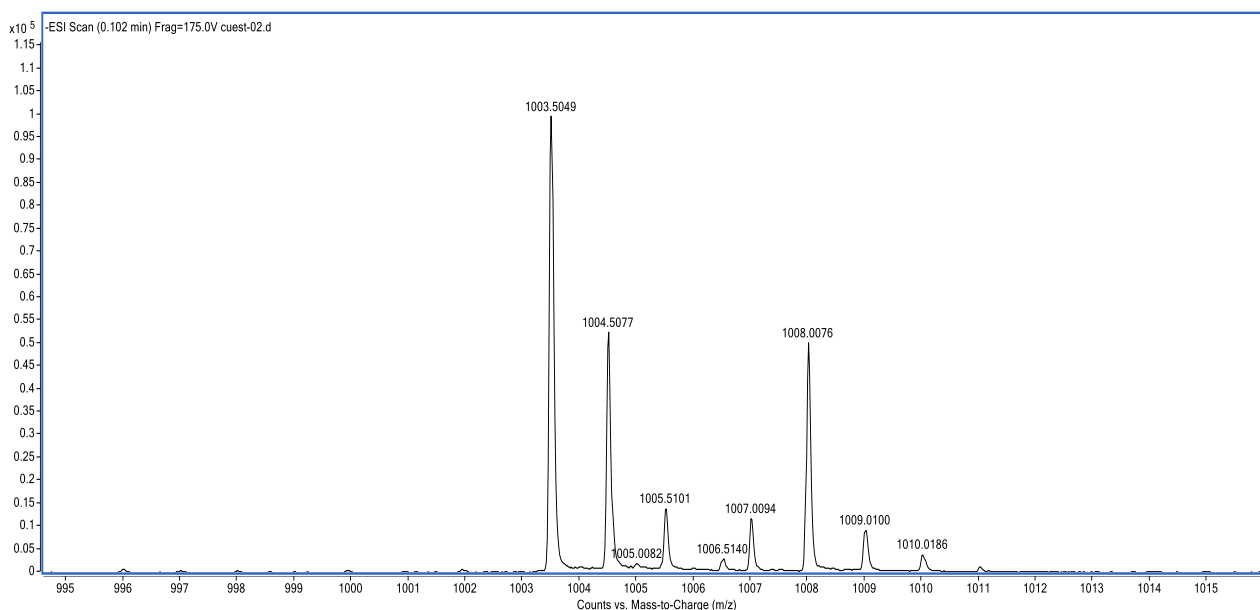

**Figure S33.** Electrospray ionization mass spectrum of **4**.

### Section C. Host-guest complexation study between crown ether **8** and ammonium salt **9**

#### 1. $^1\text{H}$ NMR spectra of an equimolar acetone solution of **8** and **9**

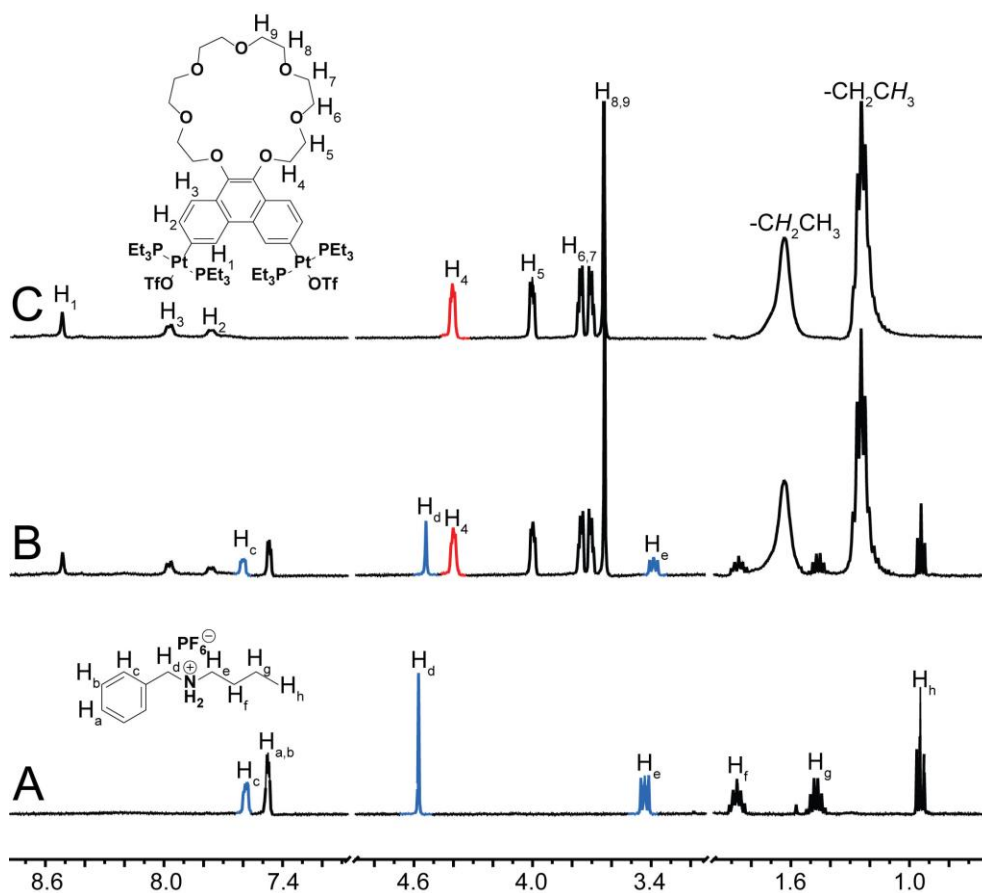

**Figure S34.**  $^1\text{H}$  NMR spectra (400 MHz,  $\text{CD}_3\text{COCD}_3$ , 295 K) of (A) 2.00 mM **9**, (B) 2.00 mM **8** and **9**, (C) 2.00 mM **8**. Upfield shifts were observed for protons  $\text{H}_d$ ,  $\text{H}_e$  of **9**, similar with benzo-21-crown-7 (B21C7)-based system, indicating the formation of inclusion complex **8·9**.

2. Determination of association constant ( $K_a$ ) by  $^1\text{H}$  NMR titration methods

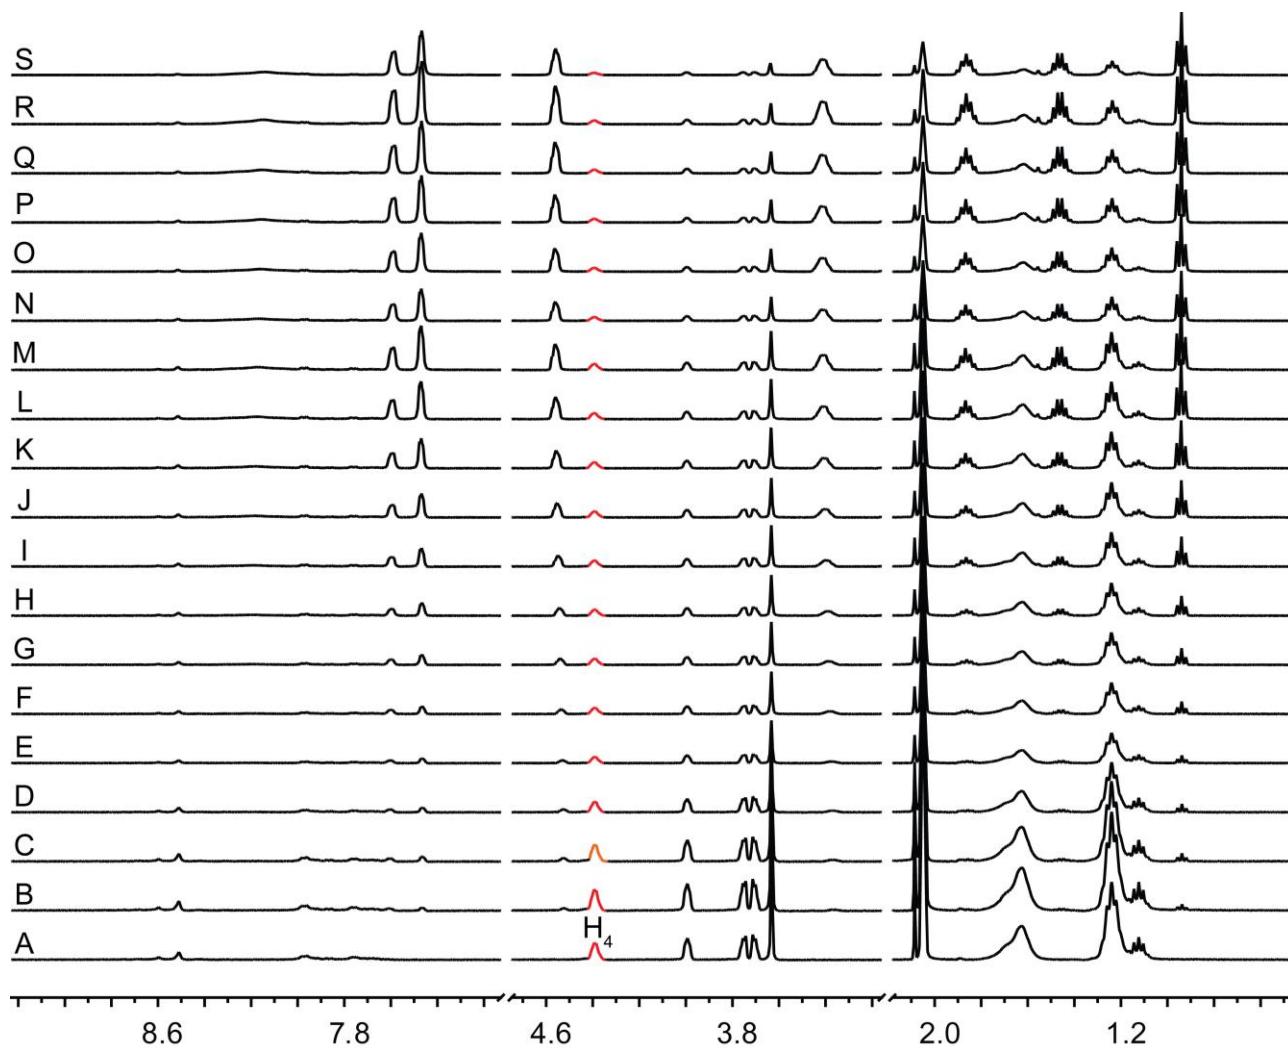

**Figure S35.**  $^1\text{H}$  NMR spectra (400 MHz,  $\text{CD}_3\text{COCD}_3$ , 295 K) of **8** at a concentration of 2.00 mM upon the addition of **9**: (A) 0.00 mM, (B) 0.19 mM, (C) 0.32 mM, (D) 0.47 mM, (E) 0.76 mM, (F) 1.23 mM, (G) 1.65 mM, (H) 2.06 mM, (I) 2.95 mM, (J) 3.92 mM, (K) 4.85 mM, (L) 6.06 mM, (M) 7.07 mM, (N) 8.43 mM, (O) 10.08 mM, (P) 12.35 mM, (Q) 14.07 mM, (R) 16.67 mM, (S) 19.48 mM.

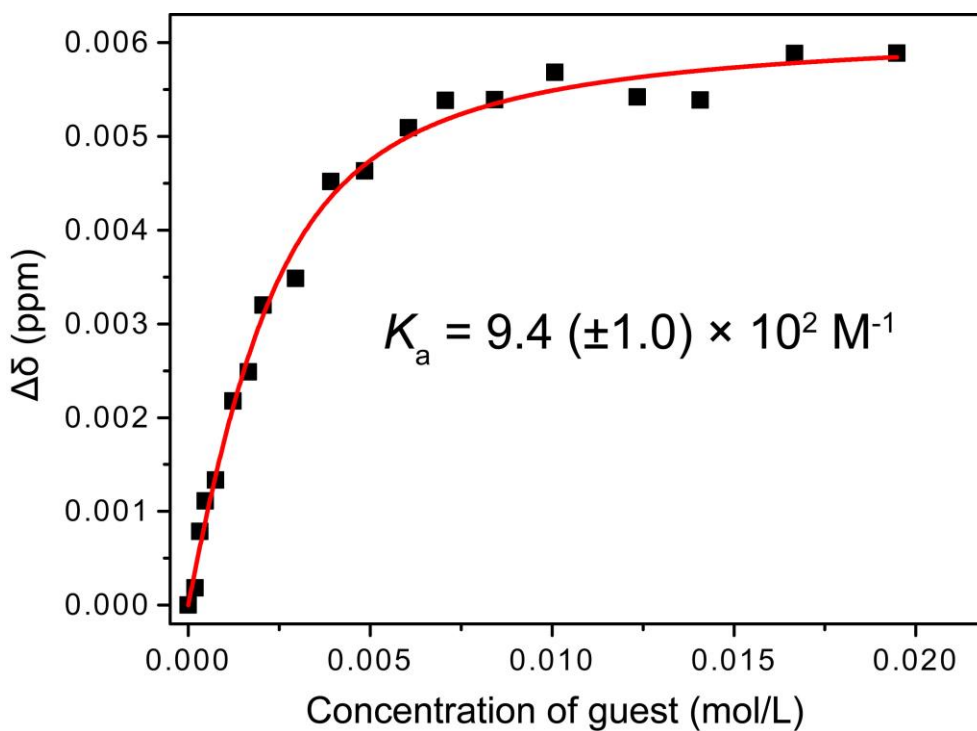

**Figure S36.** Non-linear fitting curve of the chemical shift changes of H<sub>4</sub> versus the concentration of **9**. The association constant  $K_a$  was calculated according to the following equation:

$$\Delta\delta = (\Delta\delta_{\max}/[H]_0) (0.5[G] + 0.5 ([H]_0 + 1/K_a) - (0.5([G]^2 + (2[G](1/K_a - [H]_0)) + (1/K_a + [H]_0)^2)^{0.5}))$$

Where  $\Delta\delta$  is the chemical shift change of H<sub>4</sub> on **8** upon titration,  $\Delta\delta_{\max}$  is the chemical shift change of H<sub>4</sub> when **8** is completely complexed,  $[H]_0$  is the fixed concentration of **8** (0.002 mol/L),  $[G]$  is the concentration of added **9**. Based on the above equation, the association constant ( $K_a$ ) of **8**·**9** was calculated to be  $9.4 (\pm 1.0) \times 10^2 \text{ M}^{-1}$ .

## Section D. The characterization of the supramolecular oligomers

### 1. The size of the supramolecular oligomers by two-dimensional diffusion-ordered NMR (DOSY) method

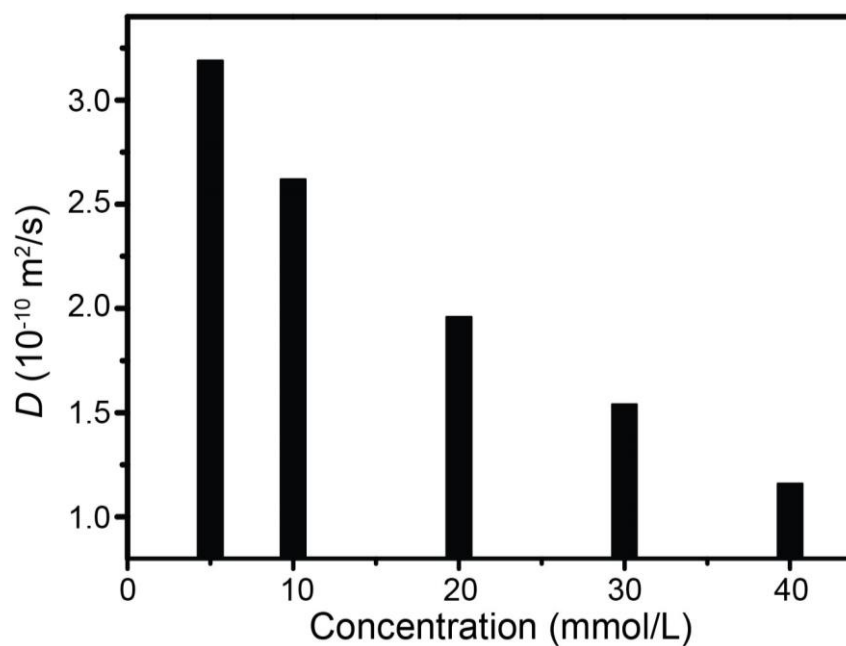

**Figure S37.** The measured weight average diffusion coefficient  $D$  of equal molar **4** and **1** at different concentrations.

## Section E. The effect of counter-ions towards the assembly process

### 1. Synthesis of bis-ammonium salt **4** with $\text{OTf}^-$ as counter ions

Compound **4** (50 mg, 0.05 mmol) and  $\text{AgOTf}$  (200 mg, 1.31 mmol) were dissolved into the mixed solution of  $\text{CH}_3\text{COCH}_3$  (4 mL) and  $\text{H}_2\text{O}$  (1 mL). The mixture was stirred at room temperature for 12 h. The filtrate was collected and the solvent was removed by  $\text{N}_2$ . The obtained solid was washed five times with water.

## 2. The $^1\text{H}$ NMR spectra of the mixture of **1** and **4**

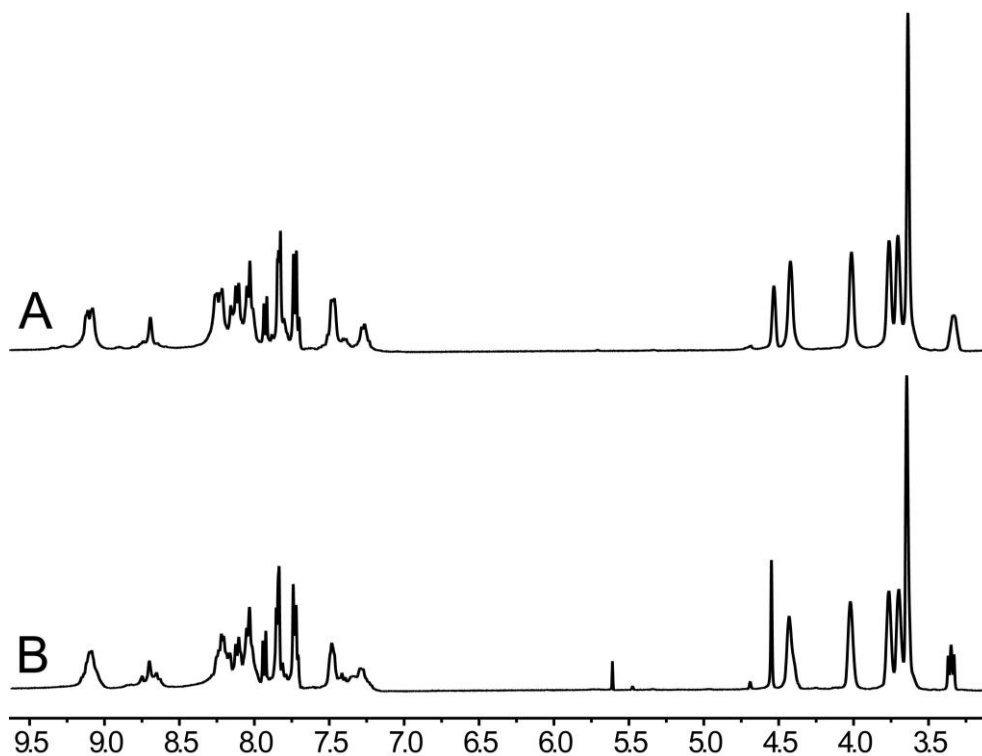

**Figure S38.** Partial  $^1\text{H}$  NMR spectra ( $\text{CD}_3\text{COCD}_3$ , 295 K, 400 MHz) of equal molar **4** and **1** at the concentration of 5 mM. (A) both **1** and **4** with  $\text{OTf}^-$  as counter ions; (B) **1** with  $\text{OTf}^-$  and **4** with  $\text{PF}_6^-$  as the counter ions

## Section F. The fluorescence properties of **1** and **4**

### 1. The aggregation-induced emission (AIE) property of **1**

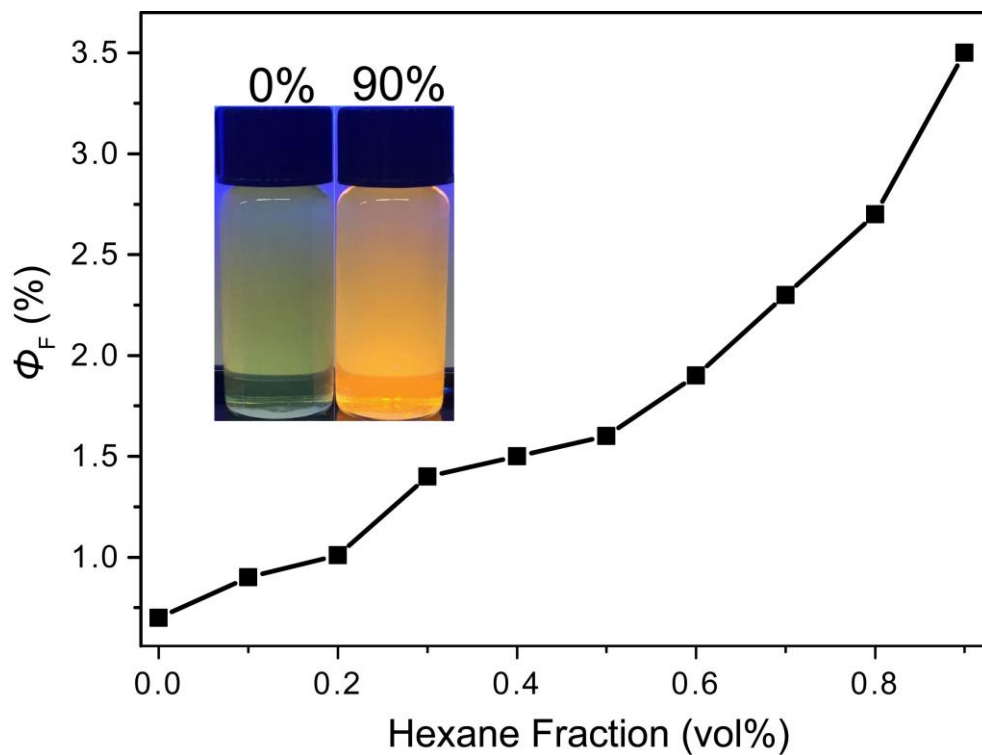

**Figure S39.** Fluorescence quantum yields of **1** versus hexane fraction in acetone/hexane mixtures ( $\lambda_{\text{ex}} = 365 \text{ nm}$ ,  $c = 10.0 \mu\text{M}$ ) which were determined using quinine sulfate at 365 nm ( $\Phi_{\text{F}} = 56\%$ ). Insets: photographs of **1** in acetone and 10%/90% acetone/hexane mixture upon excitation at 365 nm using an UV lamp at 298 K ( $c = 10.0 \mu\text{M}$ ).

## 2. The aggregation-caused quenching (ACQ) property of **4**

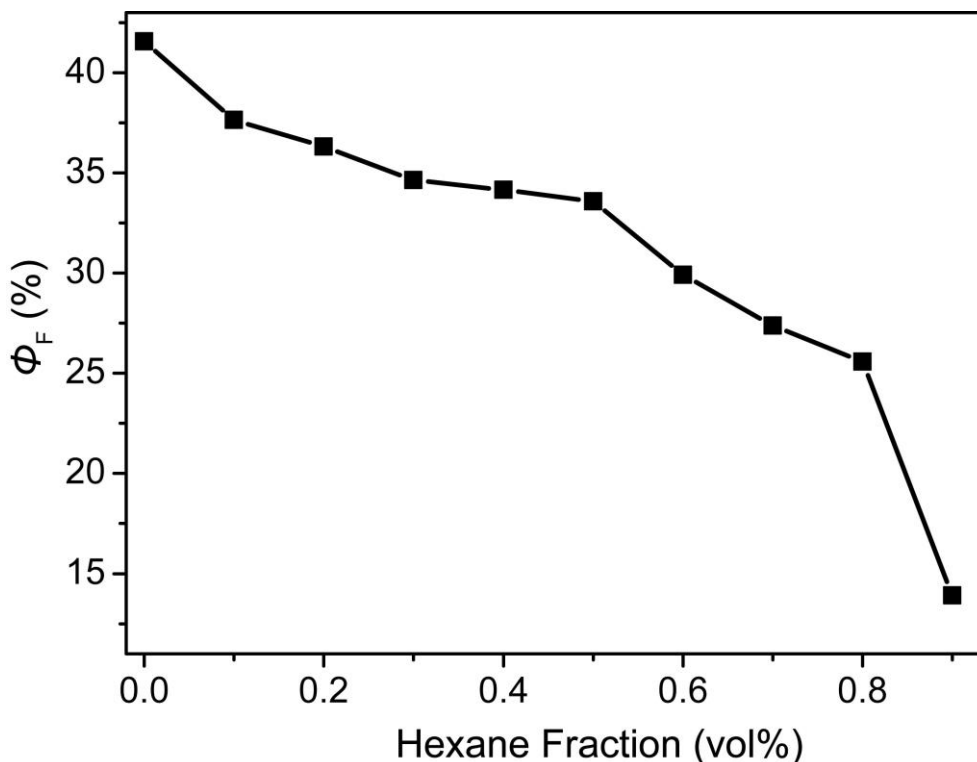

**Figure S40.** Fluorescence quantum yields of **4** versus hexane fraction in acetone/hexane mixtures ( $\lambda_{\text{ex}} = 365 \text{ nm}$ ,  $c = 10.0 \mu\text{M}$ ) which were determined using quinine sulfate at 365 nm ( $\Phi_{\text{F}} = 56\%$ ).

## Section G. References

- S1. Kim HJ, Lee E, Park HS, Lee M (2007) Dynamic Extension-Contraction Motion in Supramolecular Springs. *J Am Chem Soc* 129(36):10994–10995.
- S2. Zhang CJ, et. al. (2007) Benzo-21-Crown-7/SecondaryDialkylammonium Salt [2]Pseudorotaxane- and [2]Rotaxane-Type Threaded Structures. *Org Lett* 9(26):5553–5556.
- S3. Yoshida T, Matsuda T, Otsuka S, Parshall GW, Peet WG (1990) Tetrakis(Triethylphosphine)Platinum(0). *Inorg Synth* 28:122–123.
- S4. Ashton PR, et. al. (1996) Pseudorotaxanes Formed between Secondary Dialkylammonium Salts and Crown Ethers. *Chem Eur J* 2(6):709–728.
- S5. Qu Y, et. al. (2013) A New Triphenylamine Fluorescent Dye for Sensing of Cyanide Anion in Living Cell. *Tetrahedron Lett* 54(36):4942–4944.

- S6. Yan XZ, et. al. (2015) A Suite of Tetraphenylethylene-Based Discrete Organoplatinum(II) Metallacycles: Controllable Structure and Stoichiometry, Aggregation-Induced Emission, and Nitroaromatics Sensing. *J Am Chem Soc* 137(48):15276–15286.
- S7. Wei Wang, et. al. (2015) Discrete Stimuli-Responsive Multirotaxanes with Supramolecular Cores Constructed through a Modular Approach. *Chem Eur J* 21(16):6286–6294.
